# Supplementary material for: Anti-Inflammatory Potential of Cow, Donkey and Goat Milk Extracellular Vesicles as Revealed by Metabolomic Profile
Source: MDPI journal article supplement (doi:10.3390/nu12102908), 2020-09-23
Supplement: s1 [file s1]

# Donkey

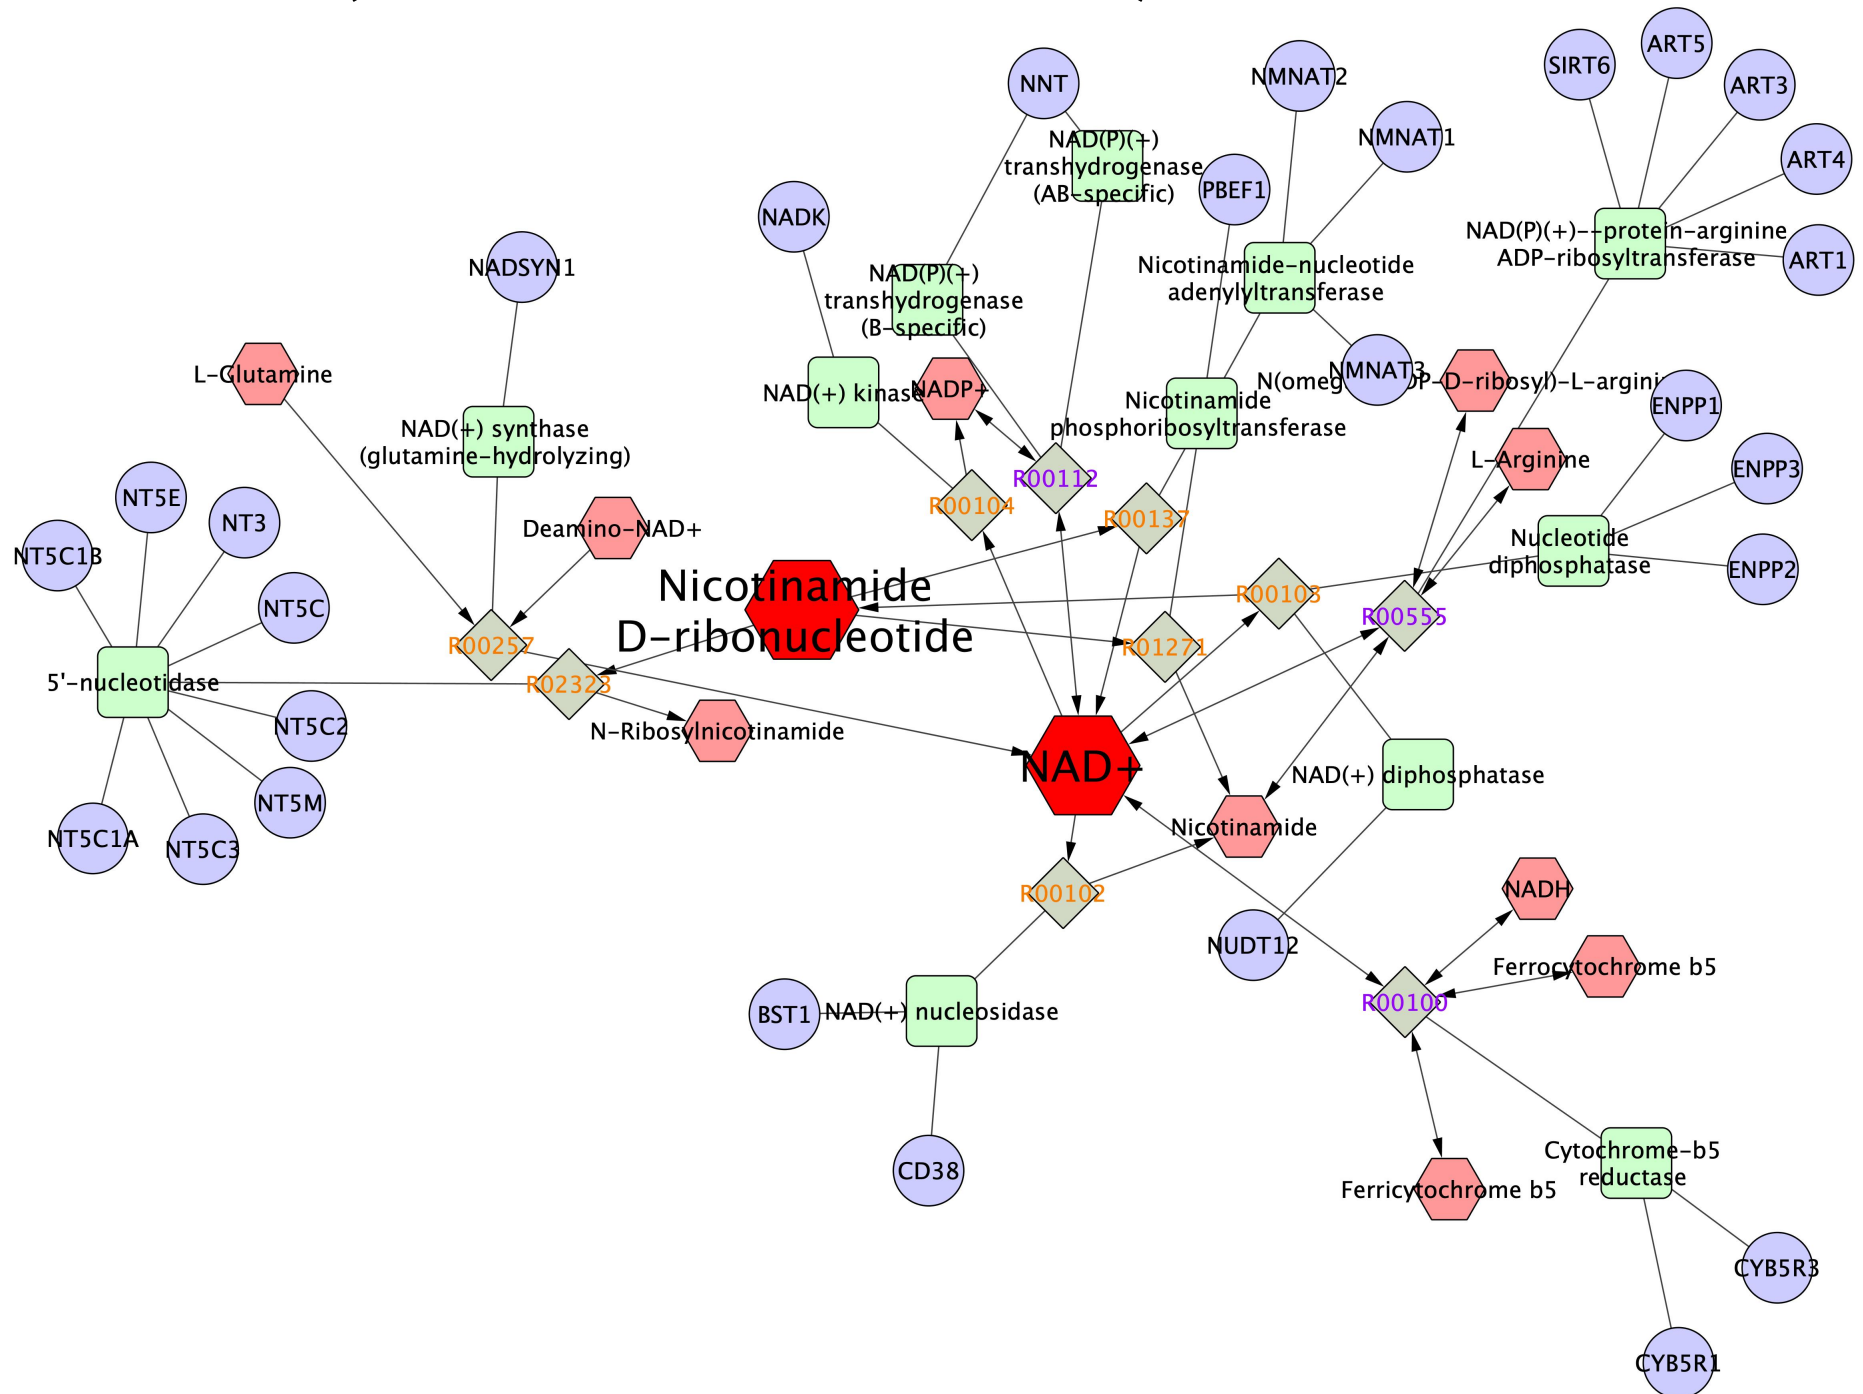

### Figure S5

# Purine metabolism

# Cow

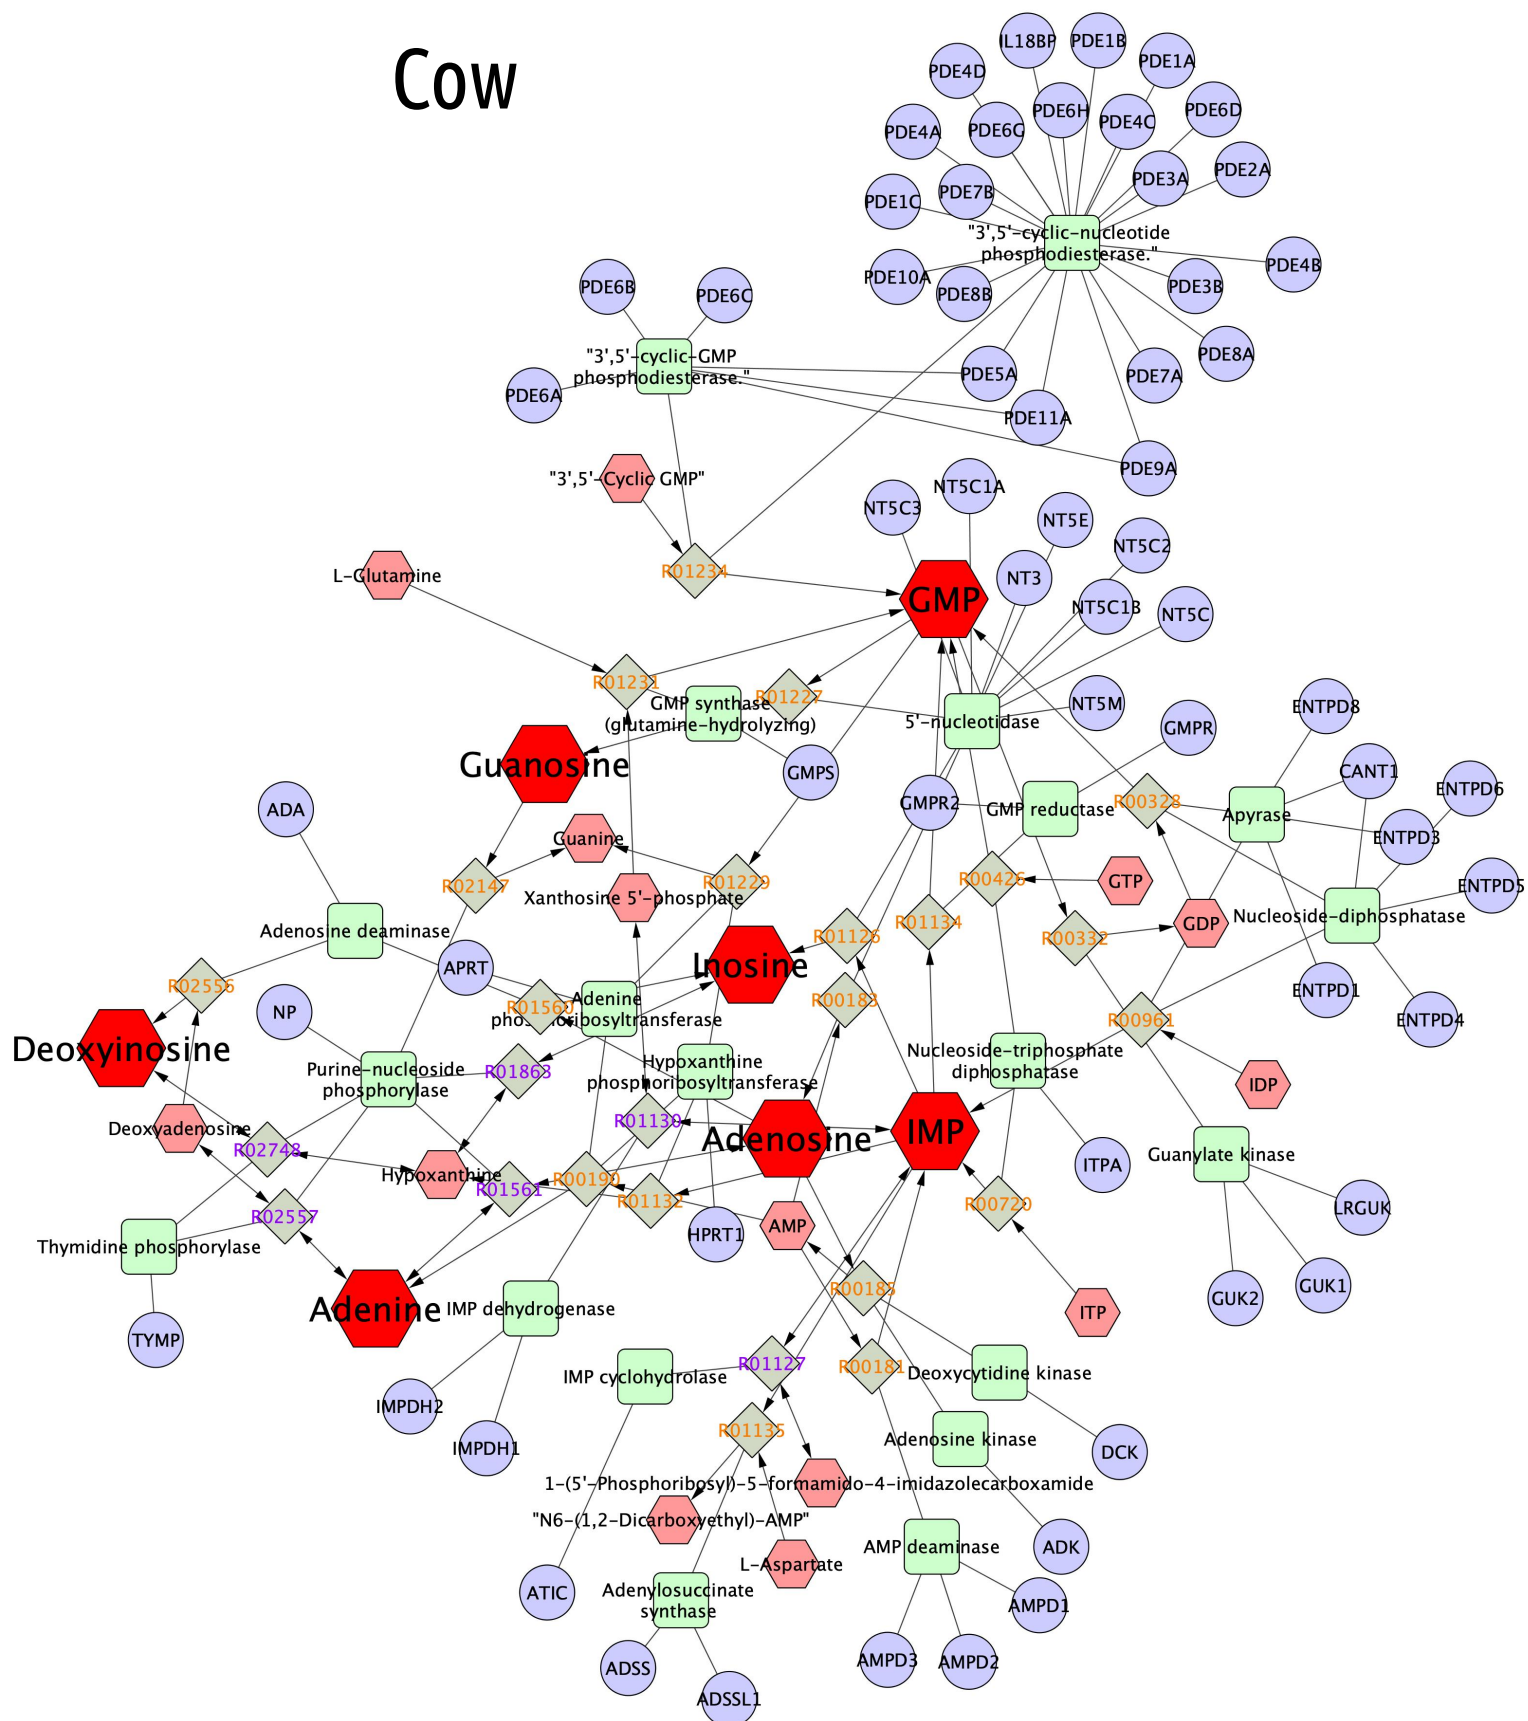

### Figure S5

# Purine metabolism

# Goat

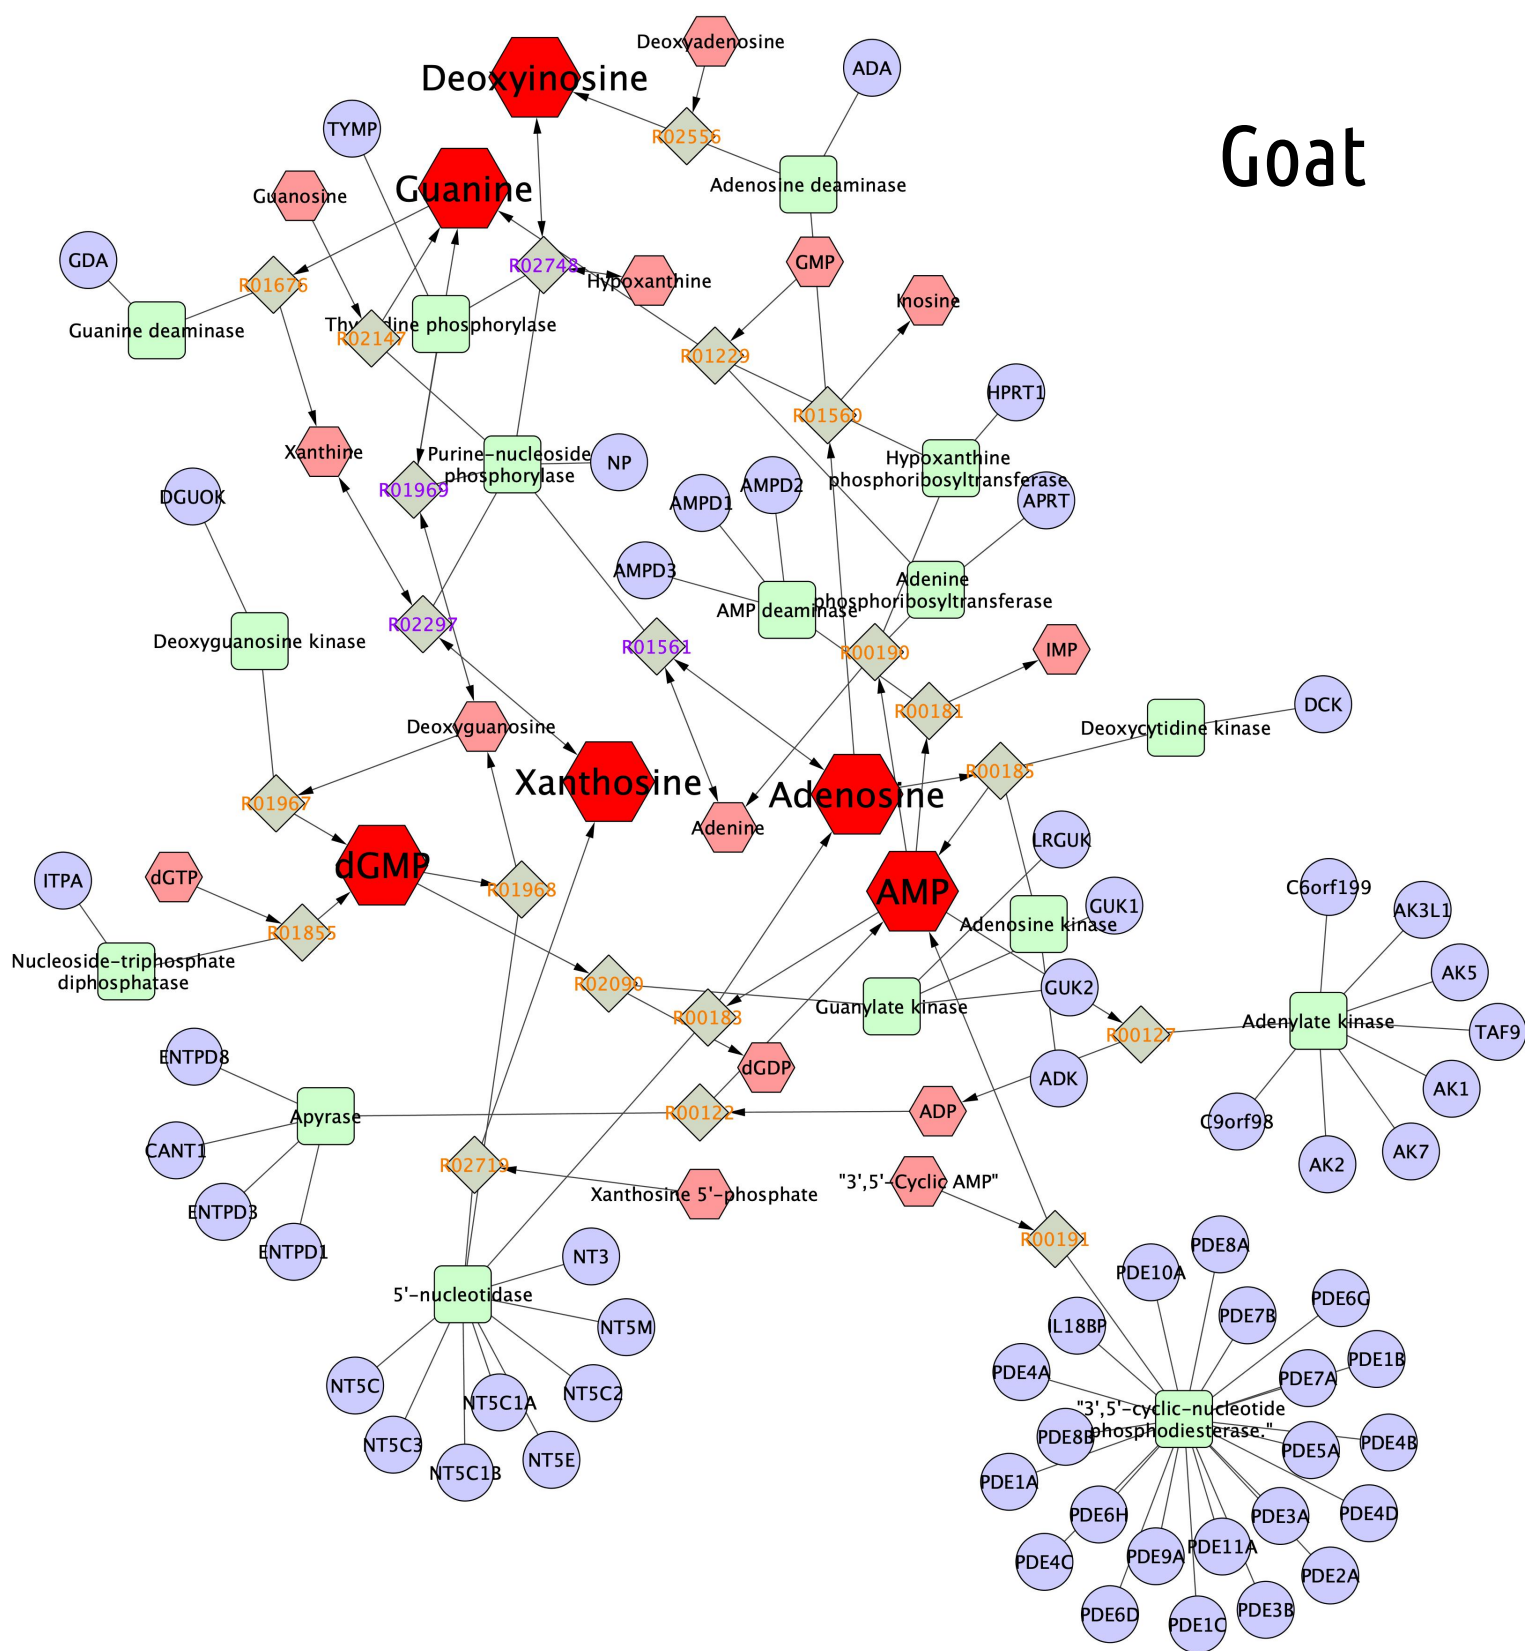

**Figure S5**



# Purine metabolism

# Donkey

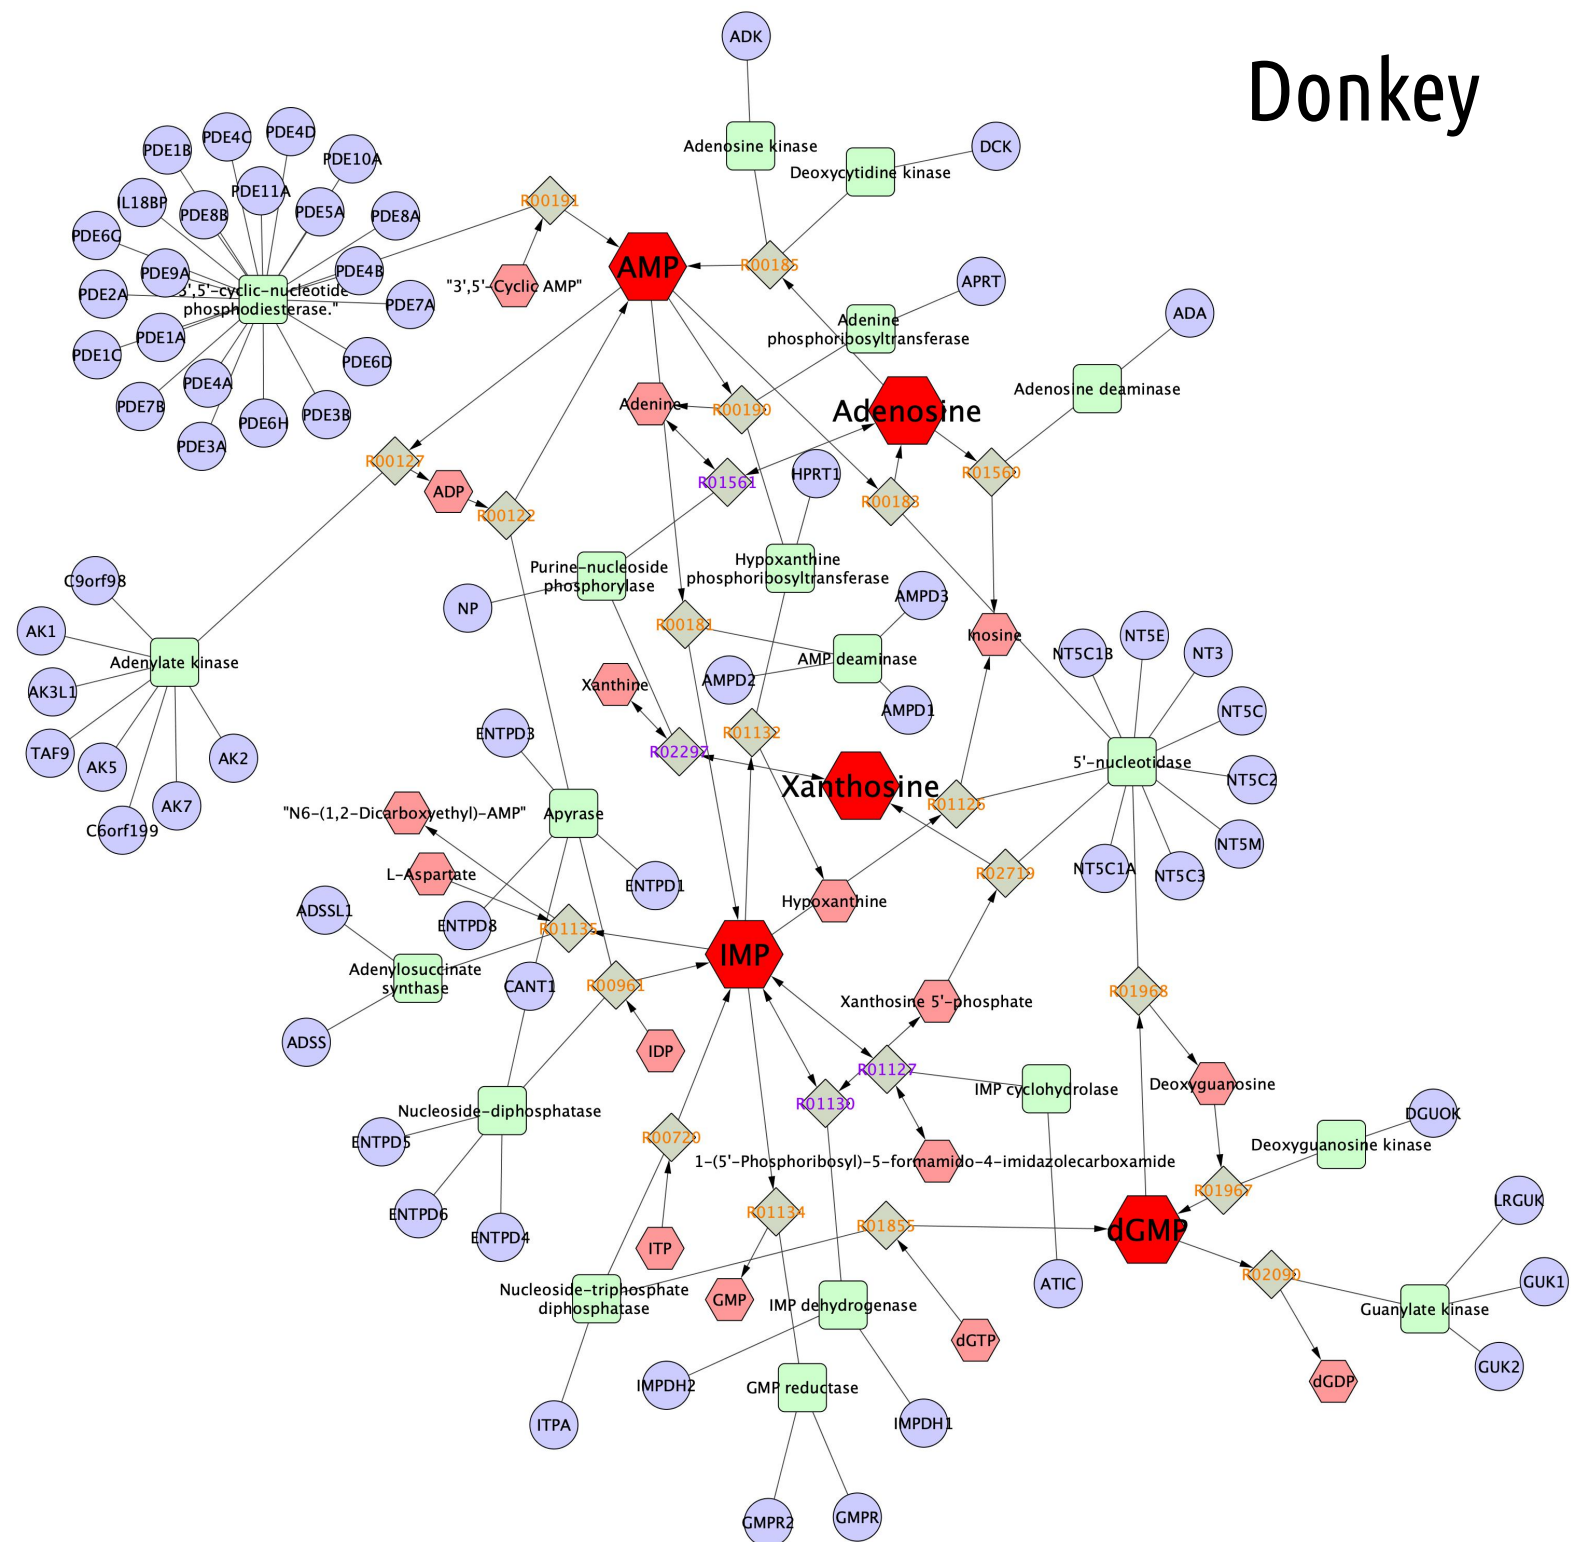

### Figure S5

# Pyrimidine metabolism

Cow

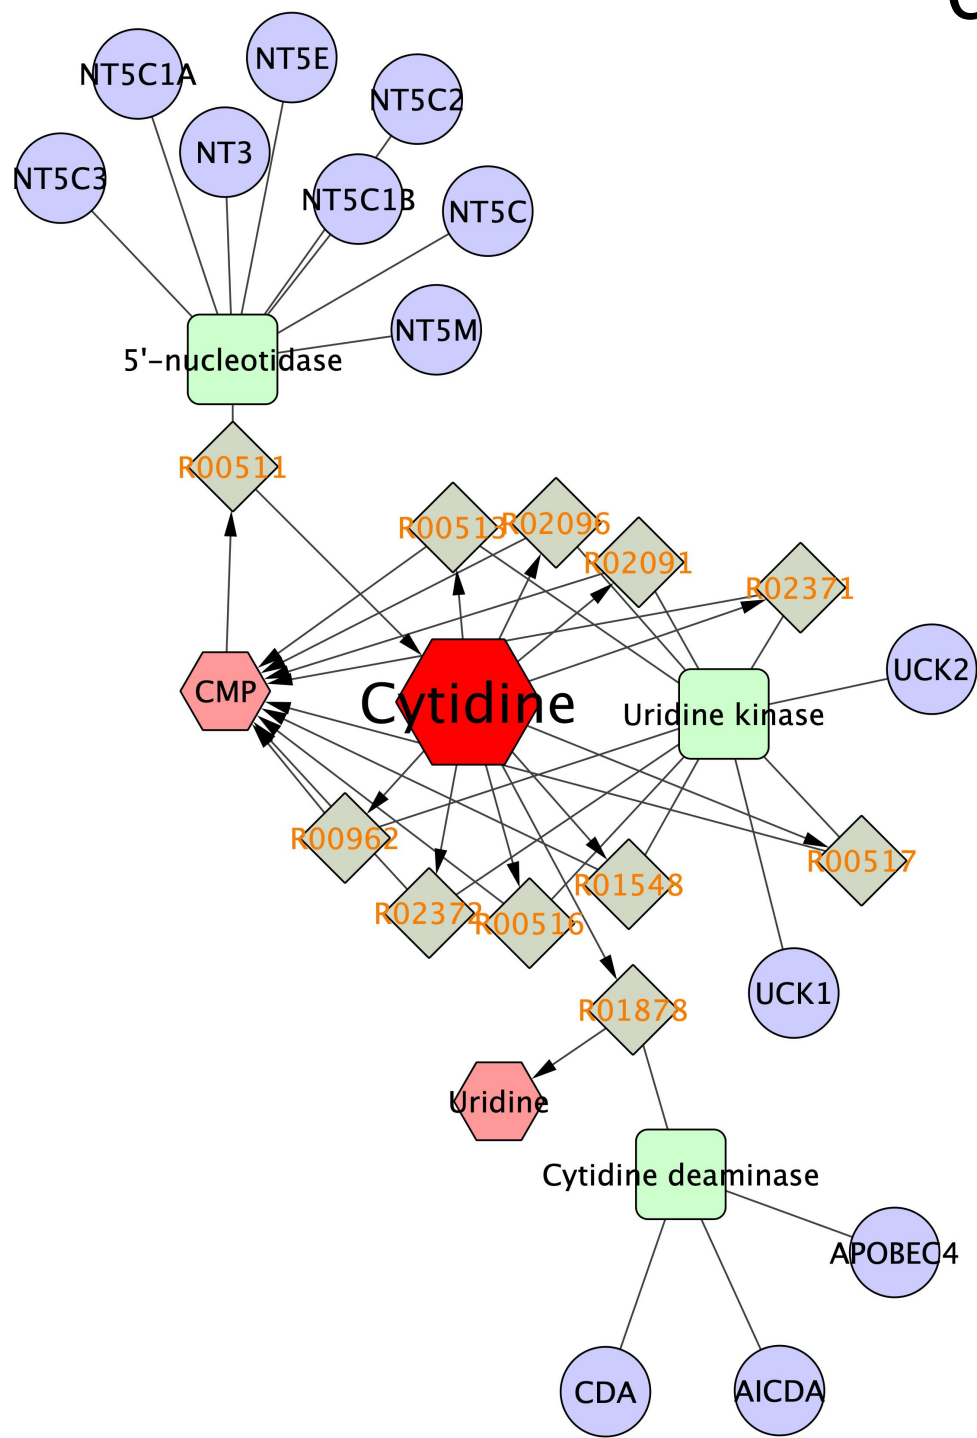

Figure S5

# Pyrimidine metabolism

## Goat

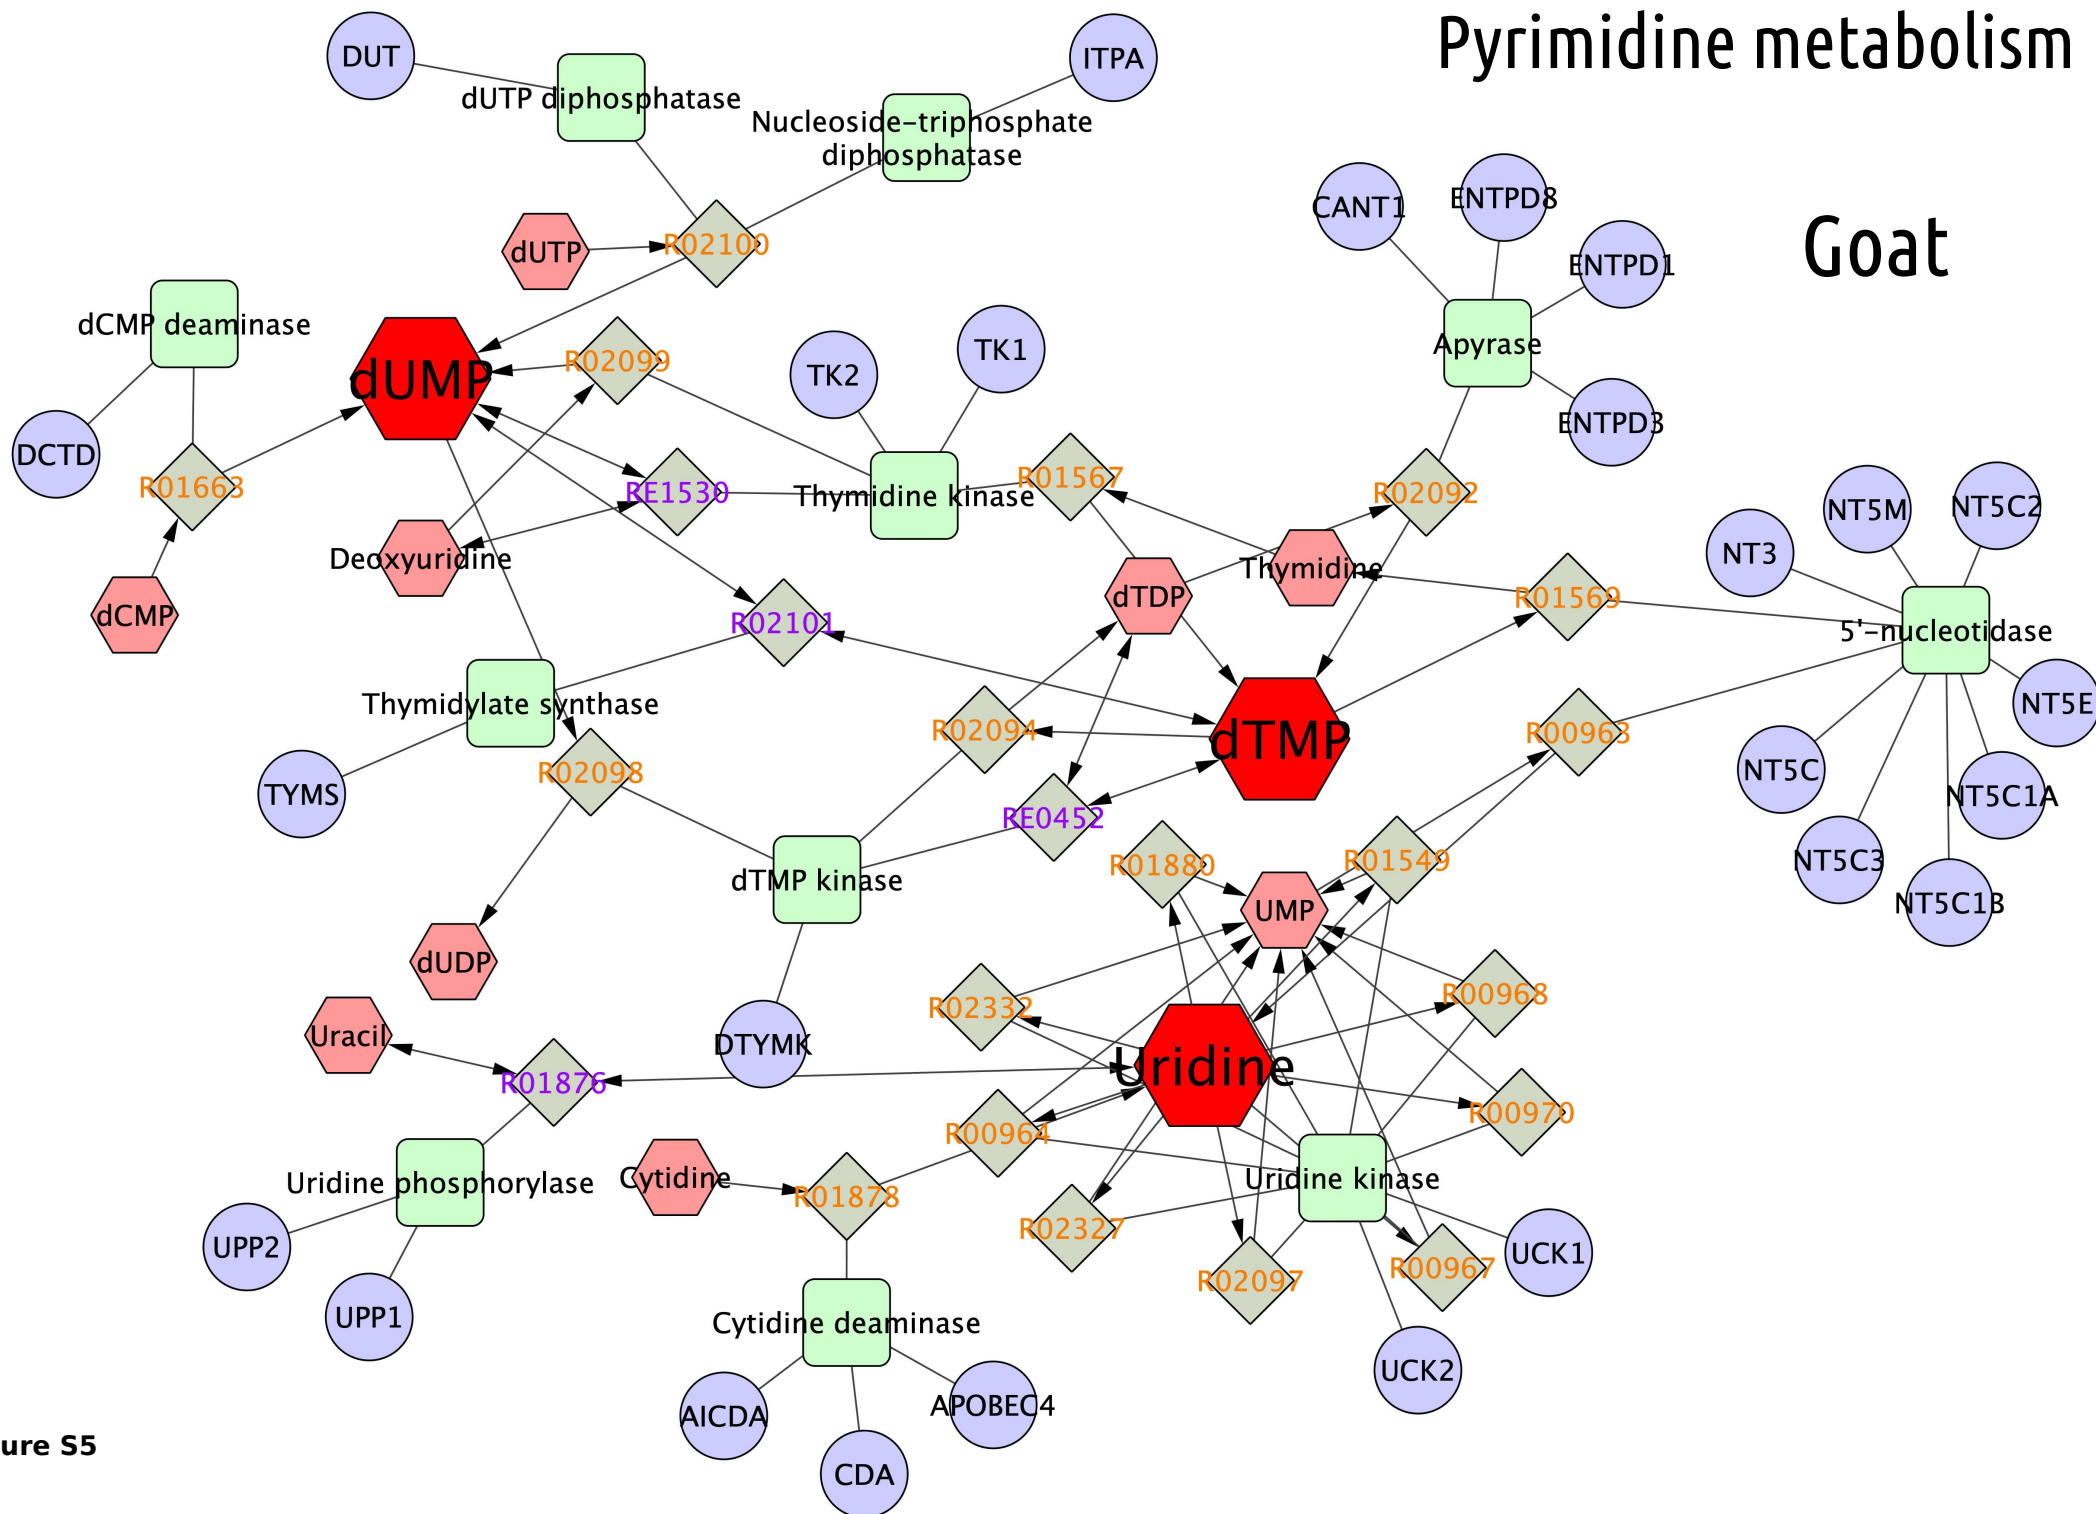

Figure S5

# Pyrimidine metabolism

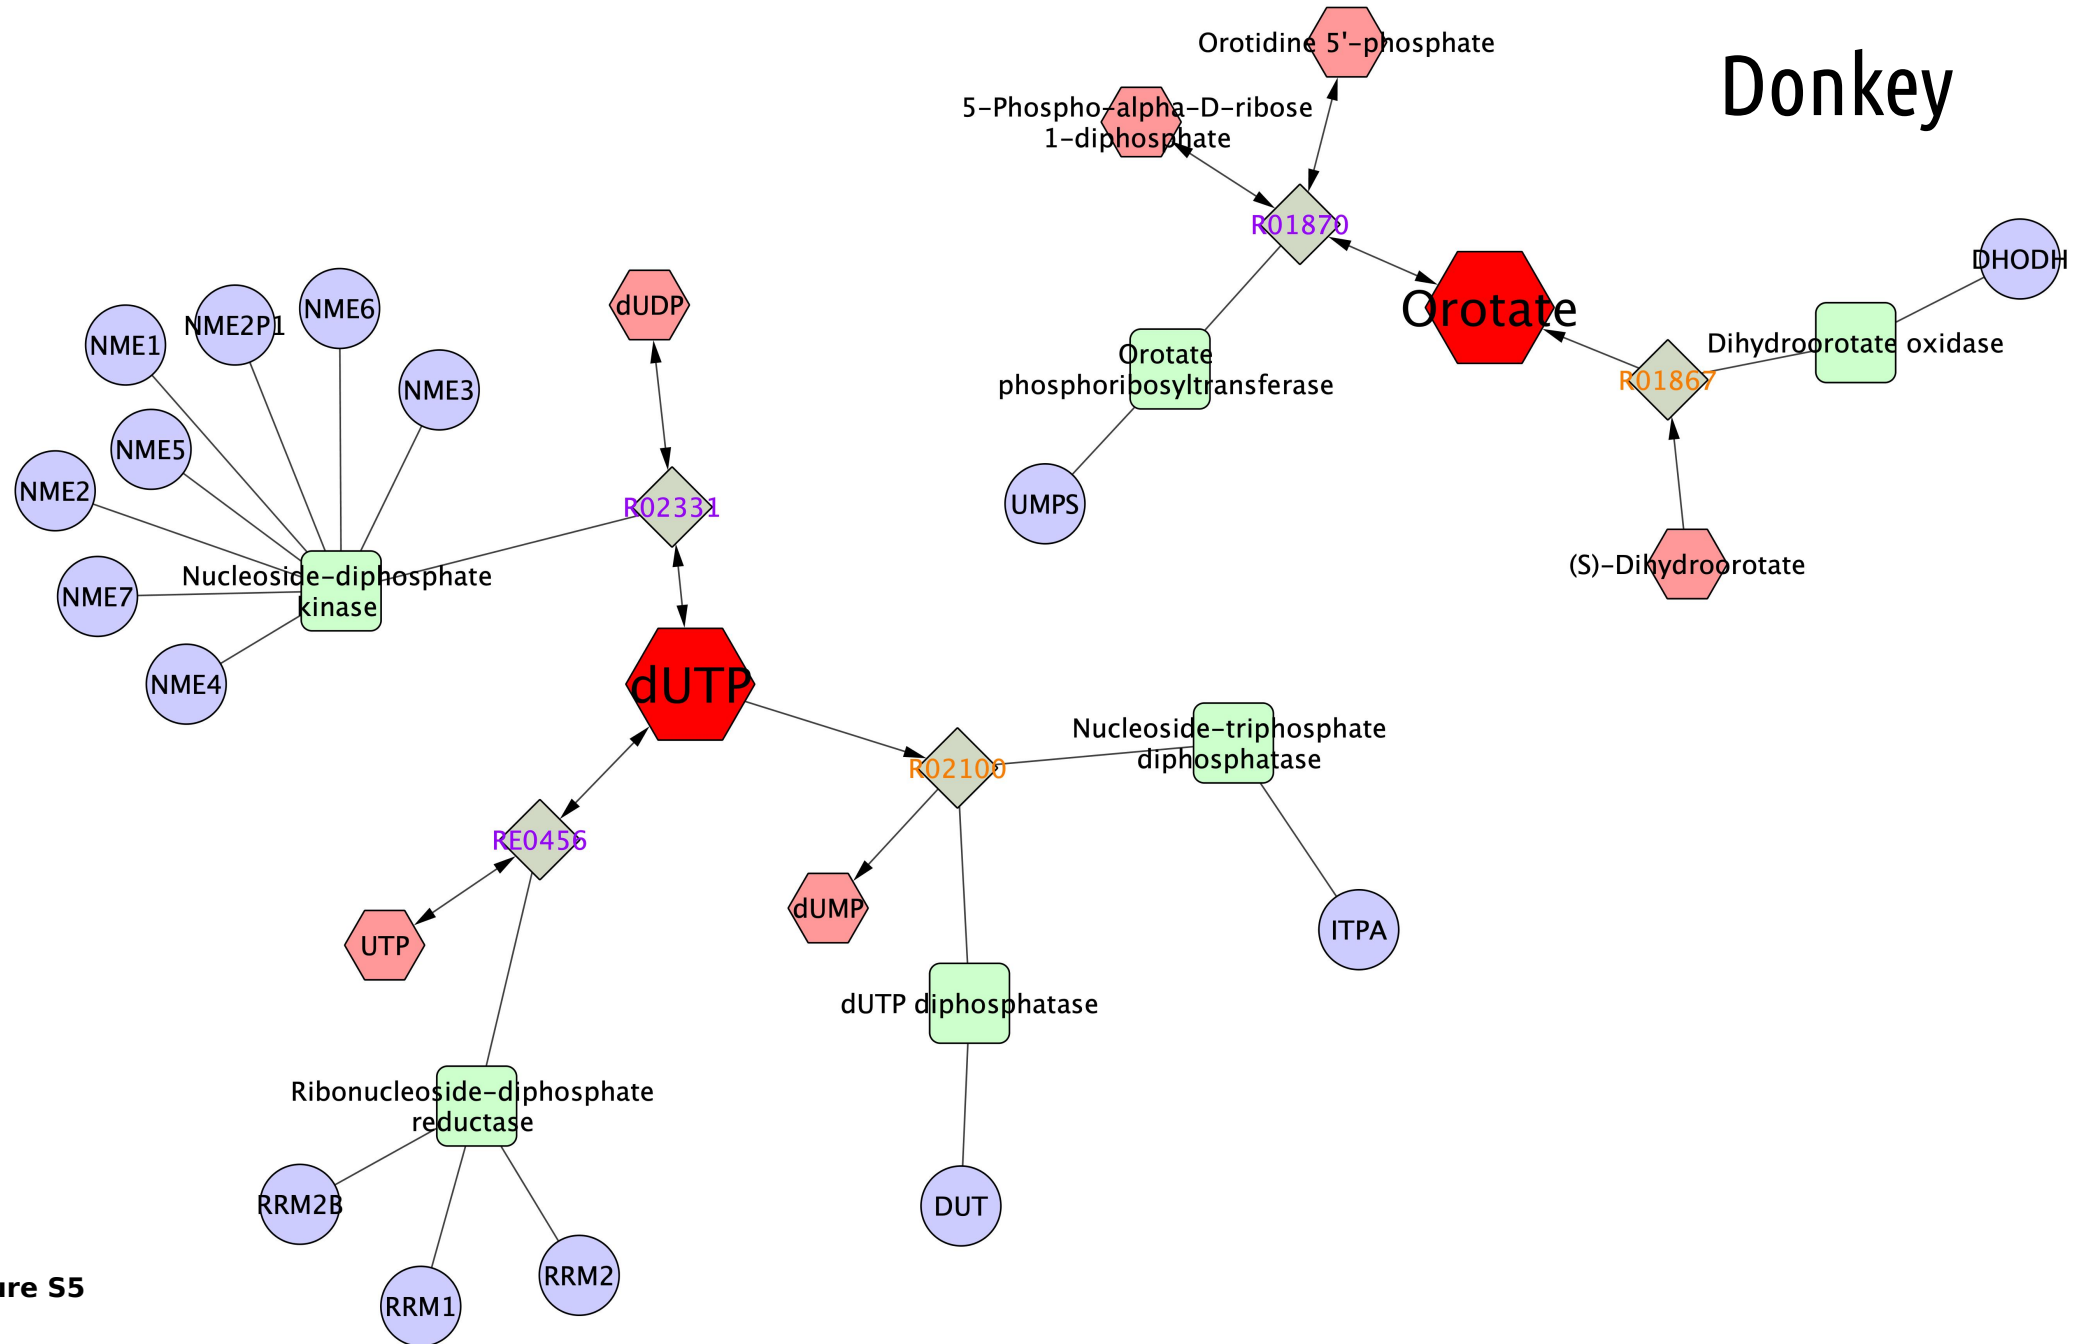

### Figure S5
