# Supplementary material for: Anti-Inflammatory Potential of Cow, Donkey and Goat Milk Extracellular Vesicles as Revealed by Metabolomic Profile
Source: MDPI journal article supplement (doi:10.3390/nu12102908), 2020-09-23
Supplement: s1 [file s1]

# Goat

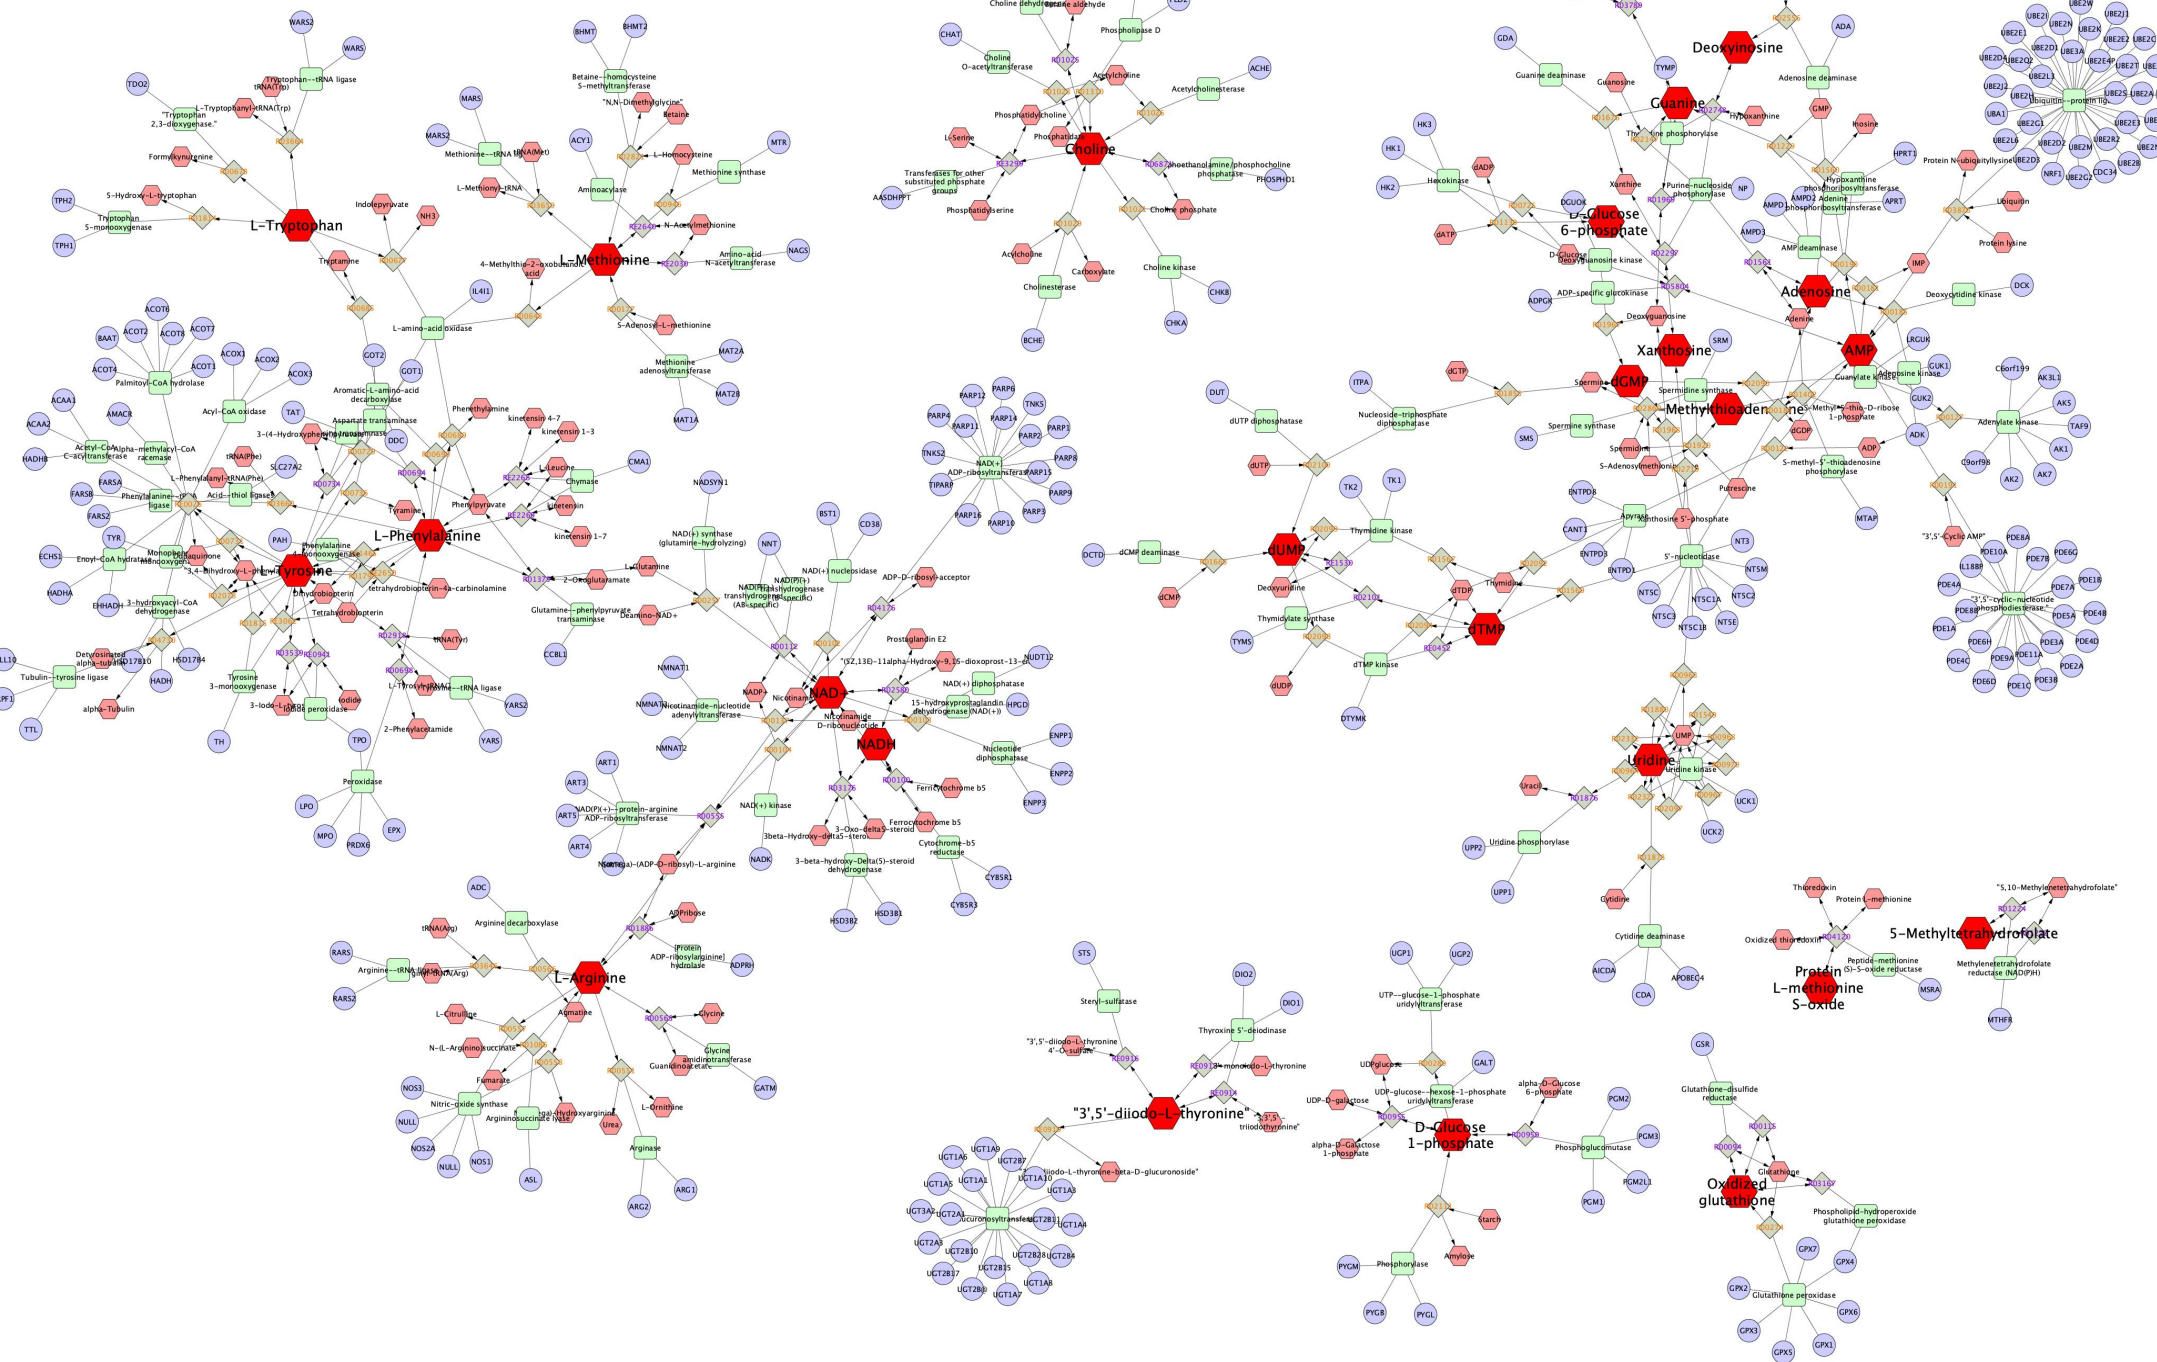

**Figure S9.** Goat total compound-reaction-enzyme-gene. Network of metabolites highly expressed in MEVs.
