# Supplementary material for: Anti-Inflammatory Potential of Cow, Donkey and Goat Milk Extracellular Vesicles as Revealed by Metabolomic Profile
Source: MDPI journal article supplement (doi:10.3390/nu12102908), 2020-09-23
Supplement: s1 [file s1]

# Tyrosine metabolism

# Donkey

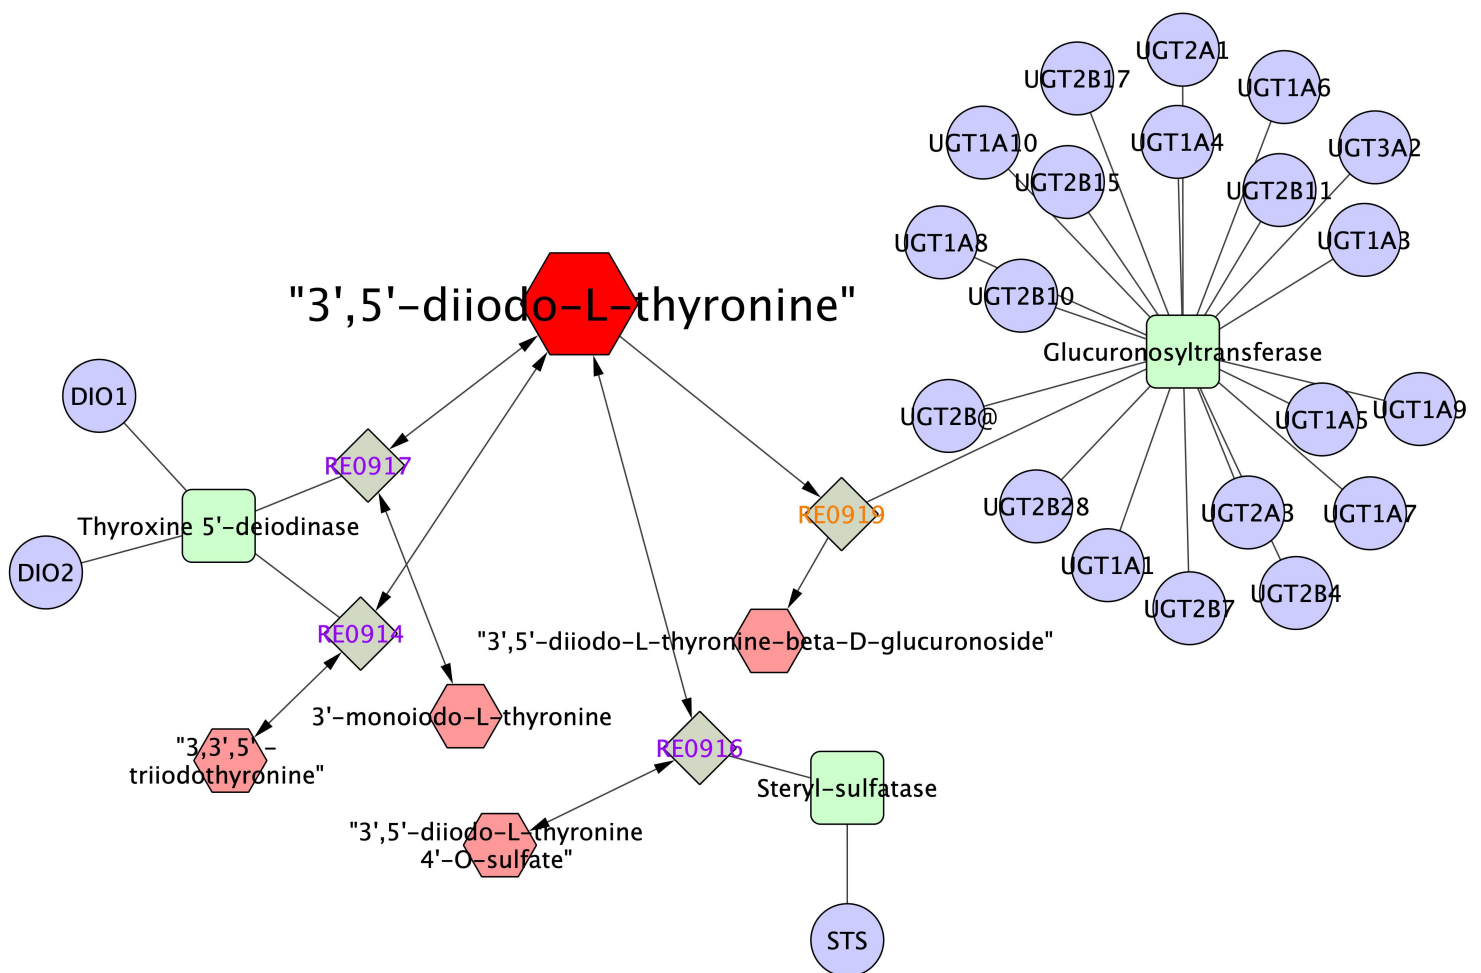

**Figure S6.** Visual representation generated by MetScape analyses of the CREGN for common pathways among two species, involving one or more MEV exclusive metabolites.

# Tyrosine metabolism

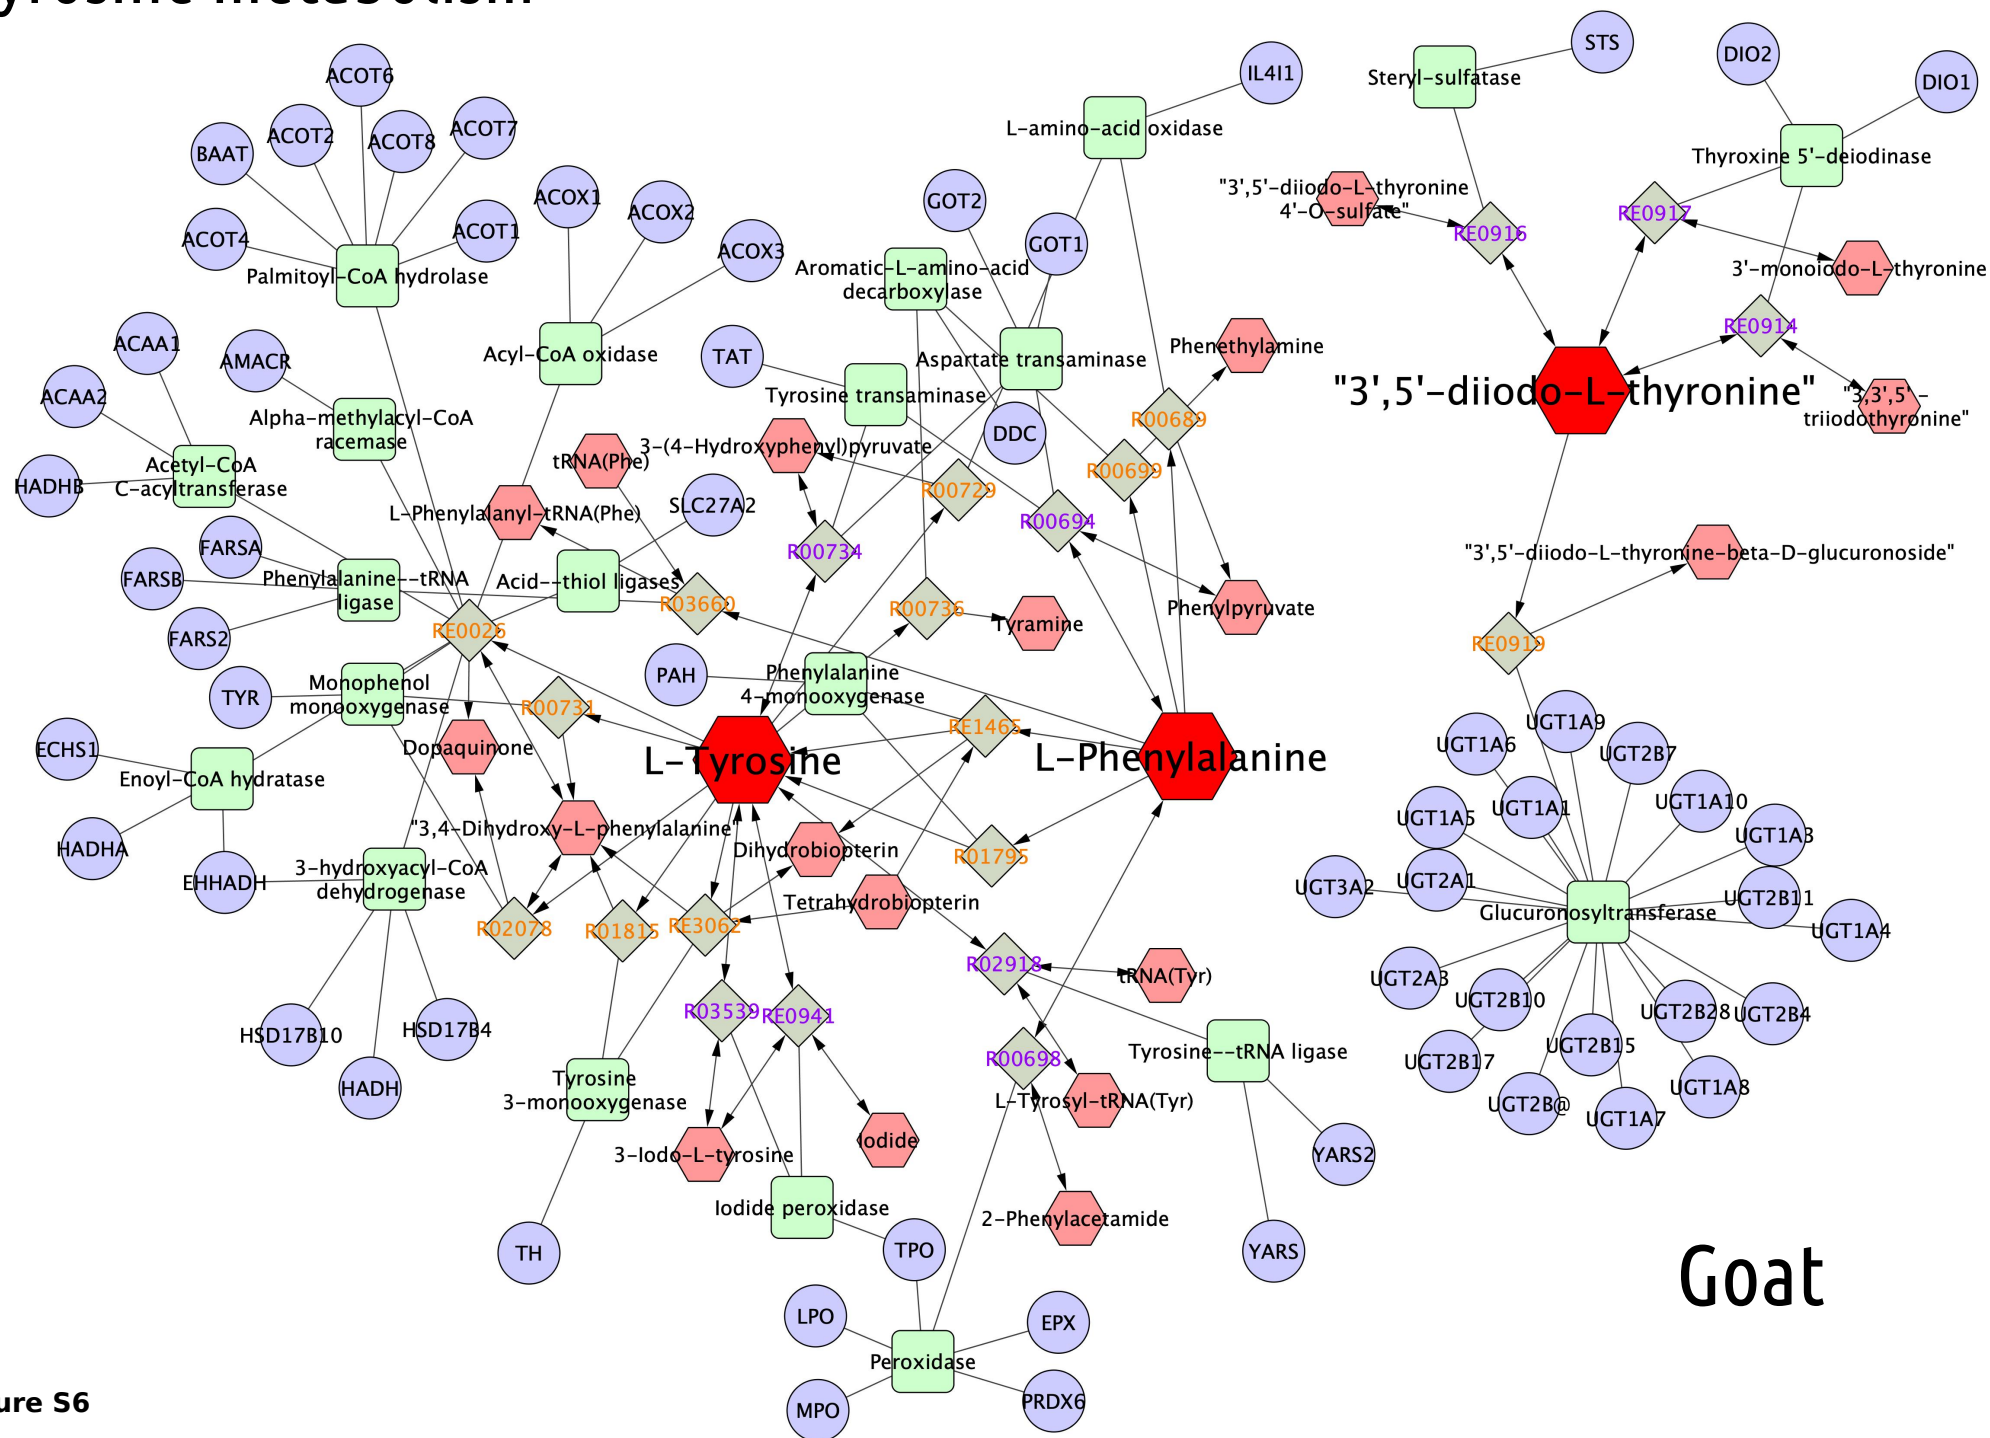

**Figure S6**

# Methionine and cysteine metabolism

Goat

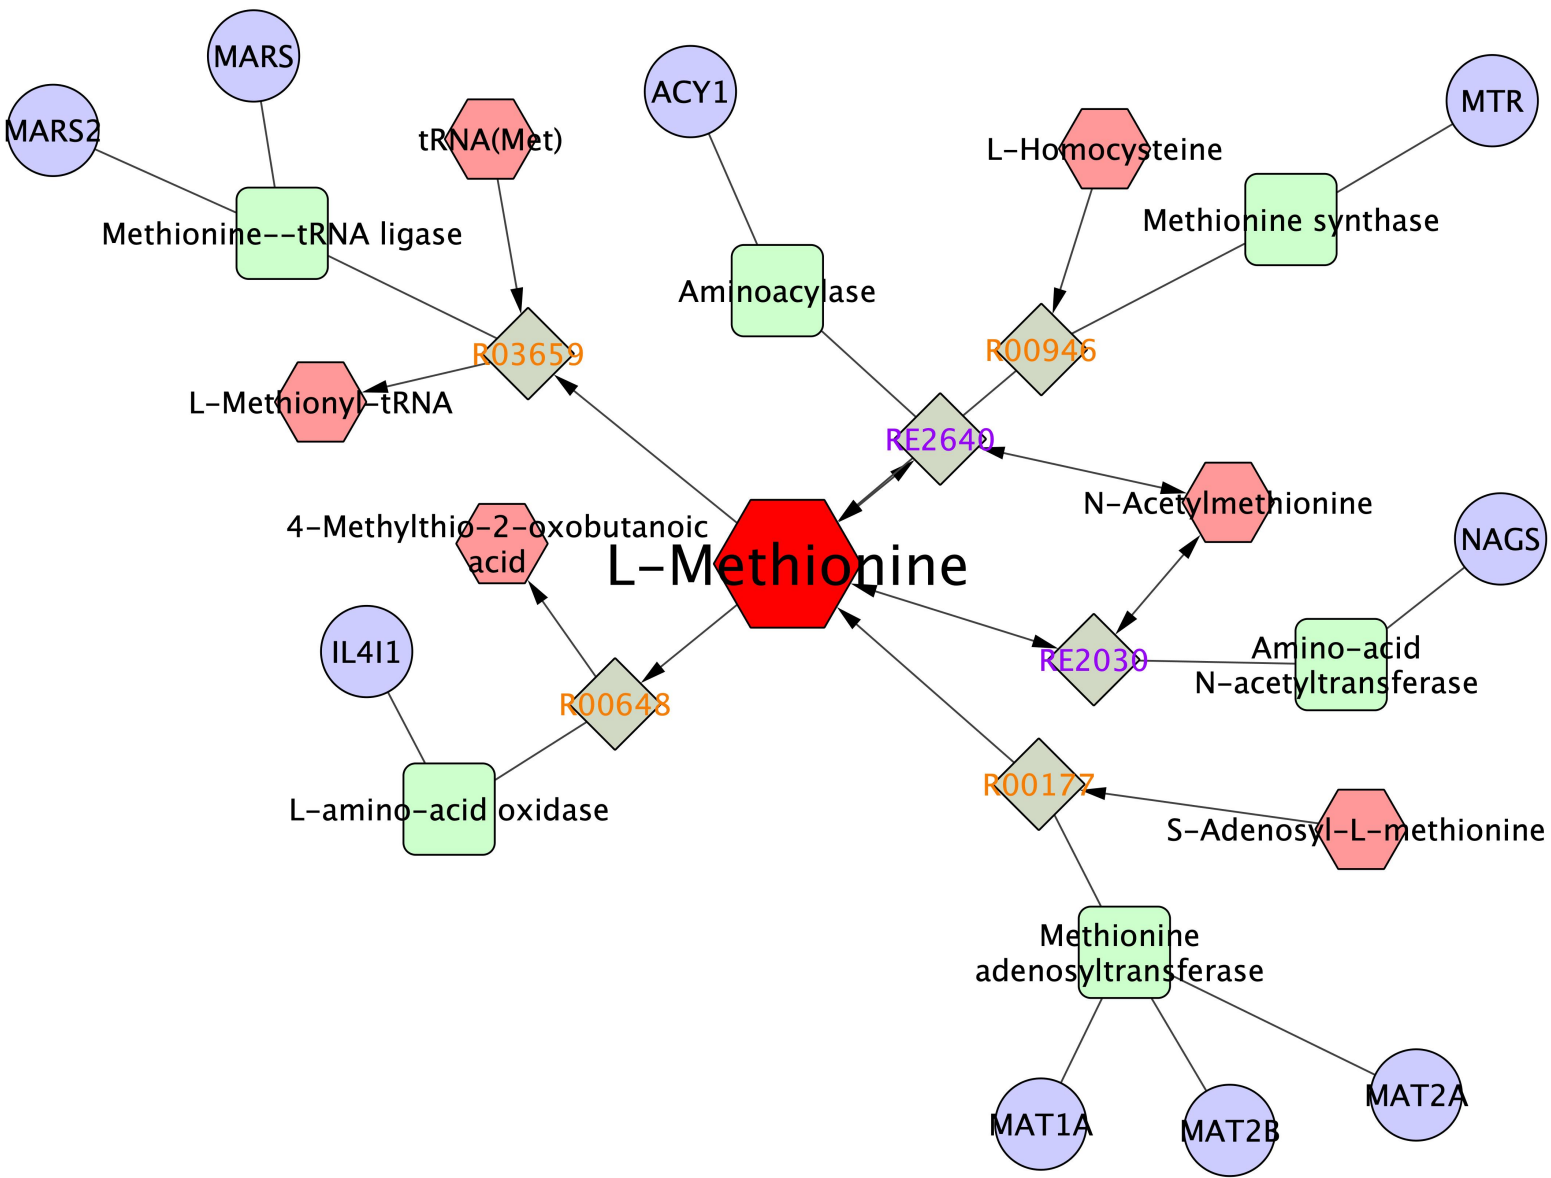

Figure S6

# Methionine and cysteine metabolism

Donkey

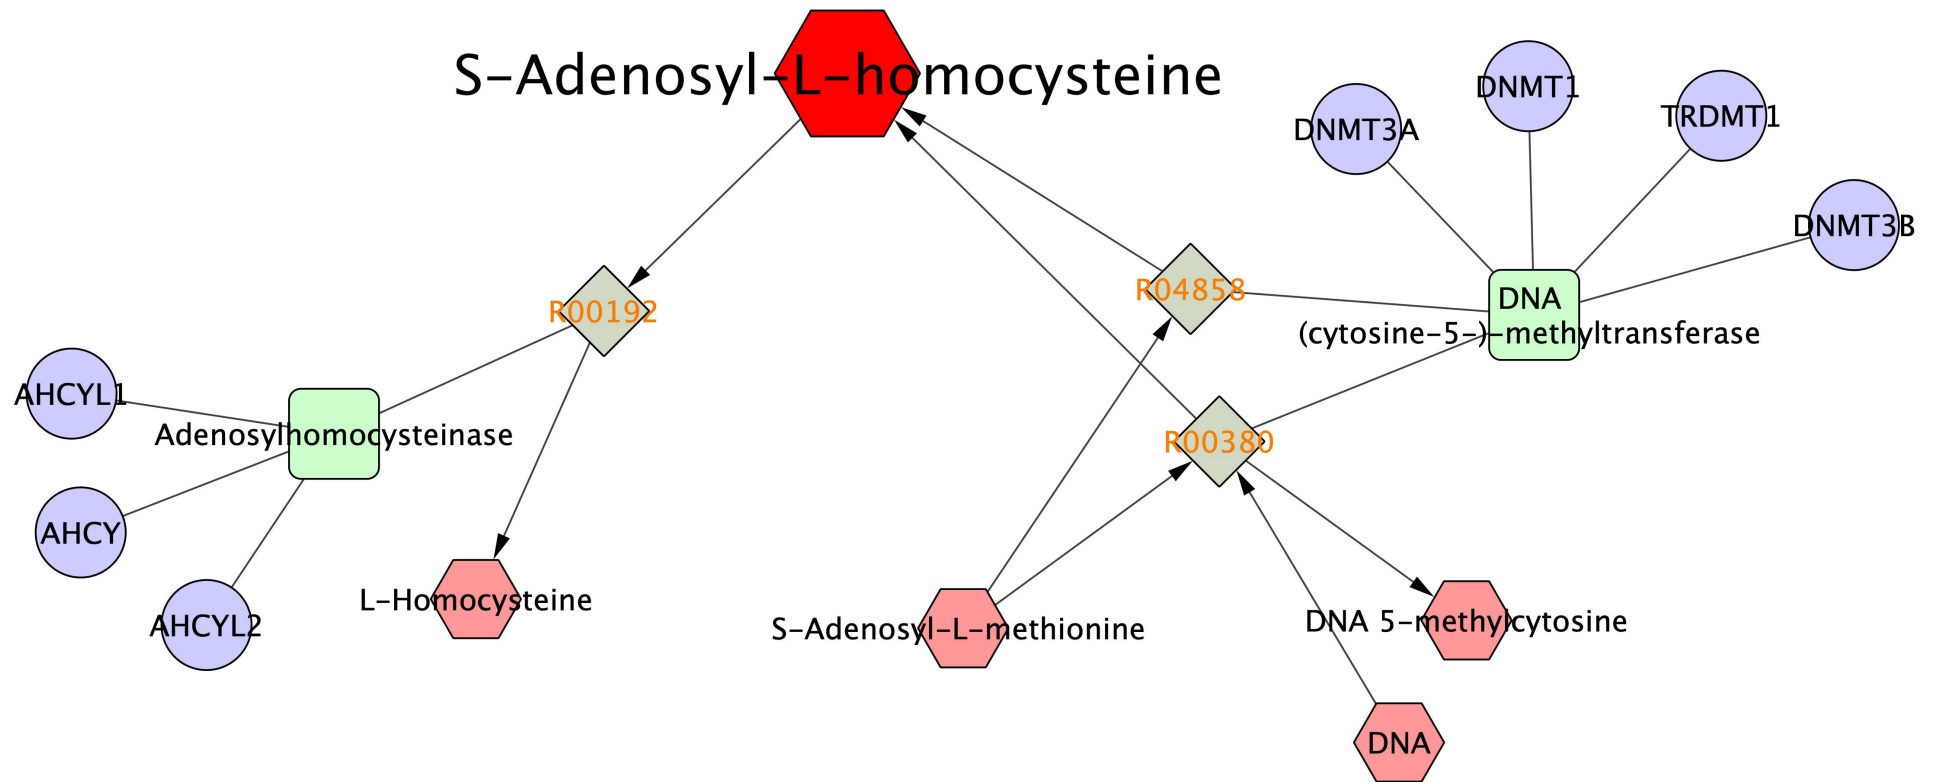

Figure S6
