# Supplementary material for: Anti-Inflammatory Potential of Cow, Donkey and Goat Milk Extracellular Vesicles as Revealed by Metabolomic Profile
Source: MDPI journal article supplement (doi:10.3390/nu12102908), 2020-09-23
Supplement: s1 [file s1]

## Vitamin B6 (pyridoxine) metabolism

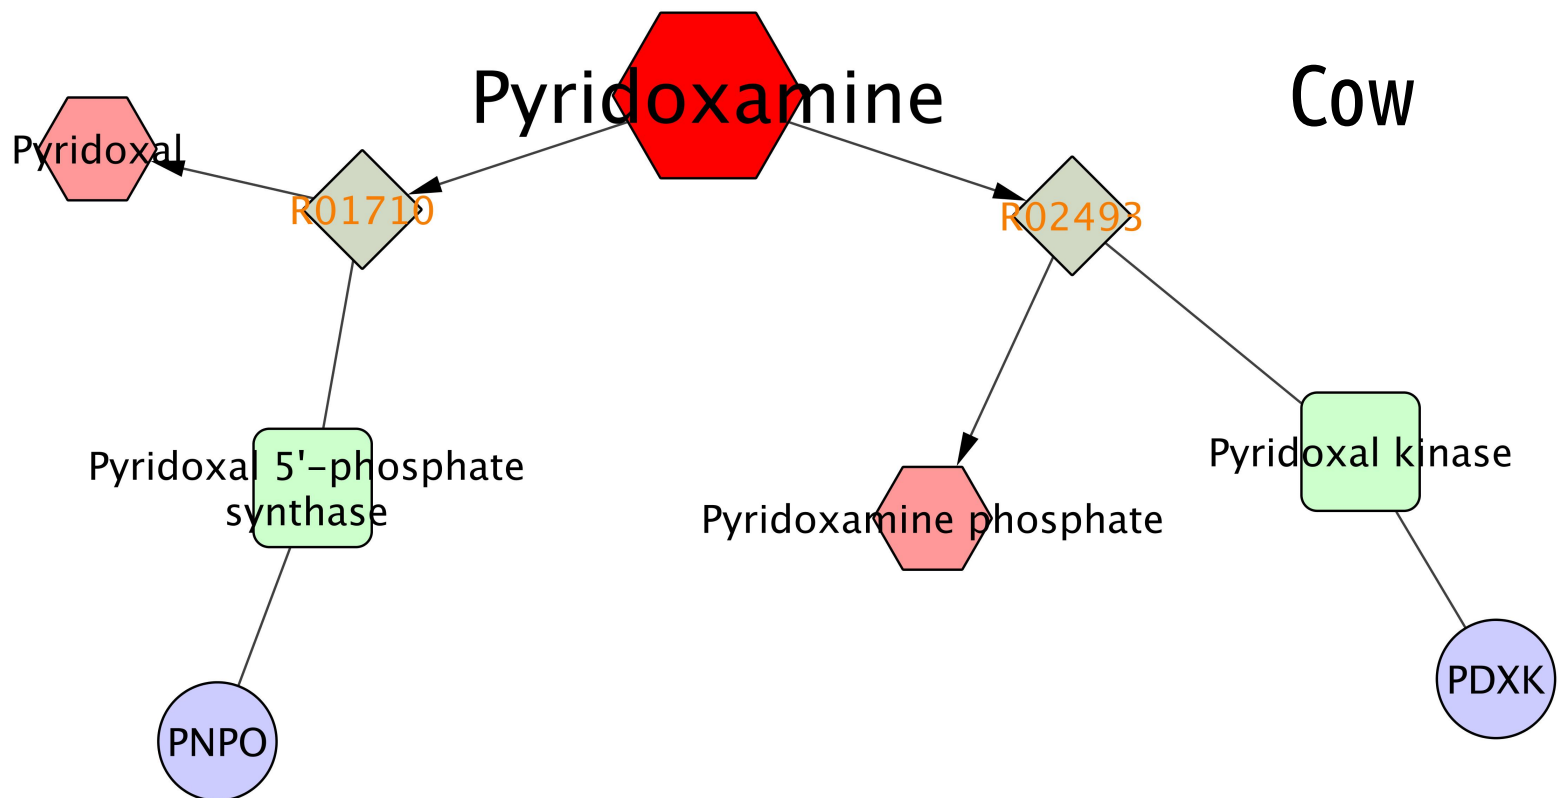

## Vitamin B2 (riboflavin) metabolism

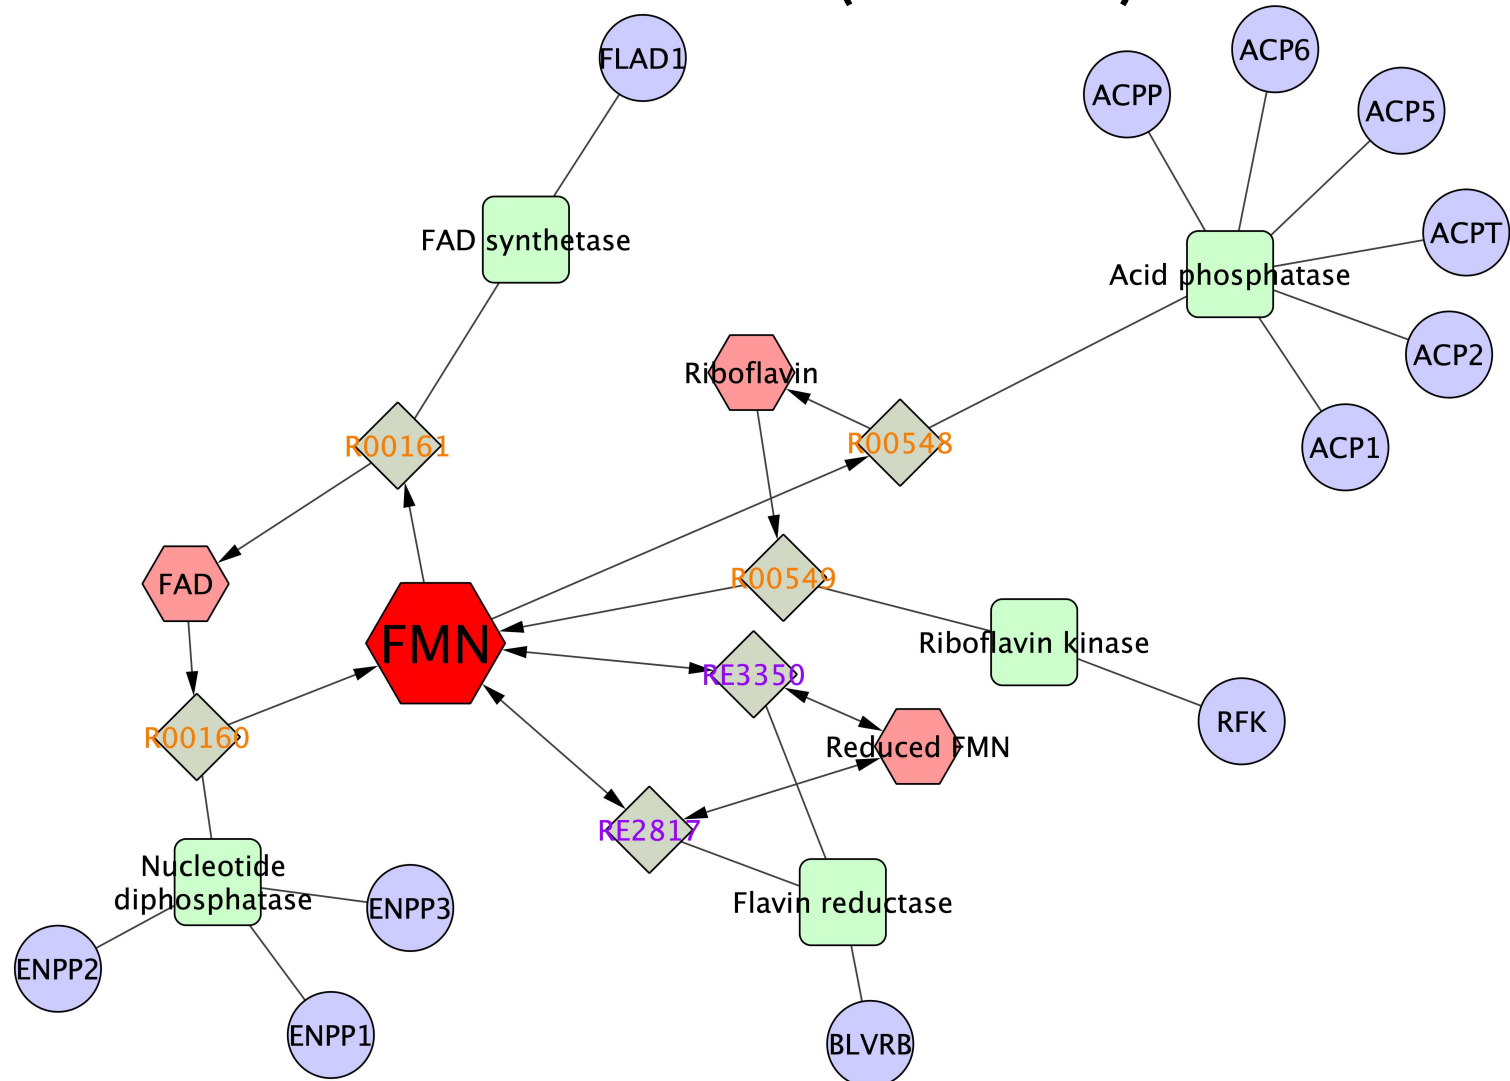

**Figure S7.** Peculiar pathway of a specific species emerged with the MetScape analysis (CREGN).

# Lipoate metabolism

Cow

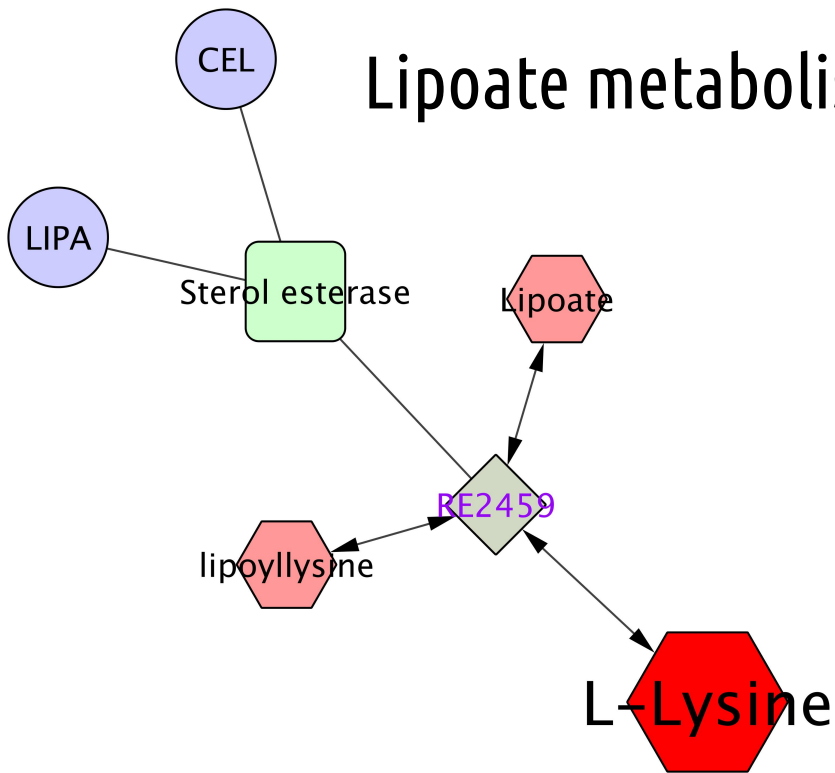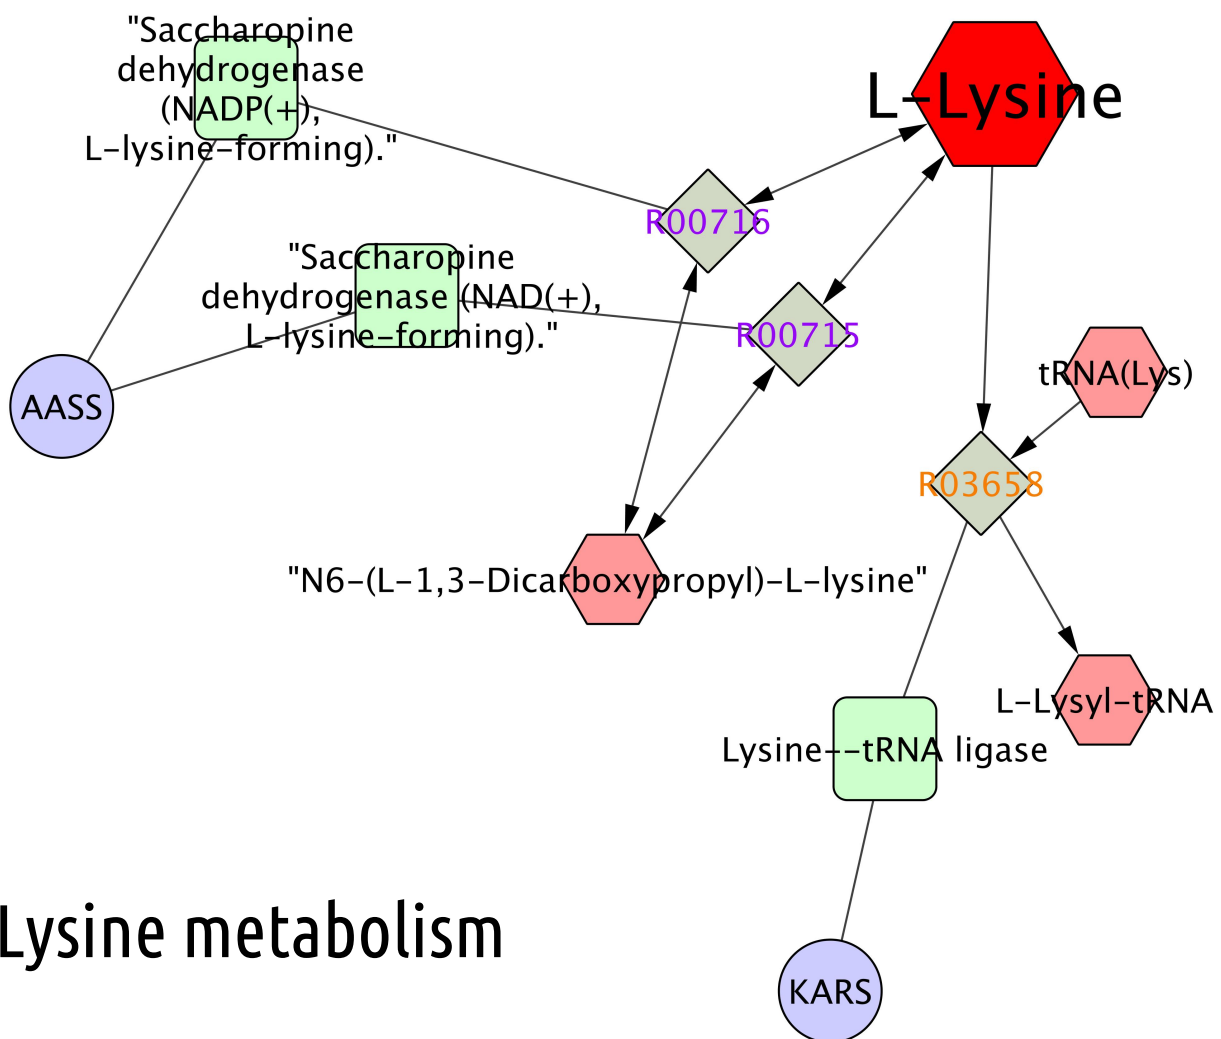

Figure S7

# Vitamin H (biotin) metabolism

Cow

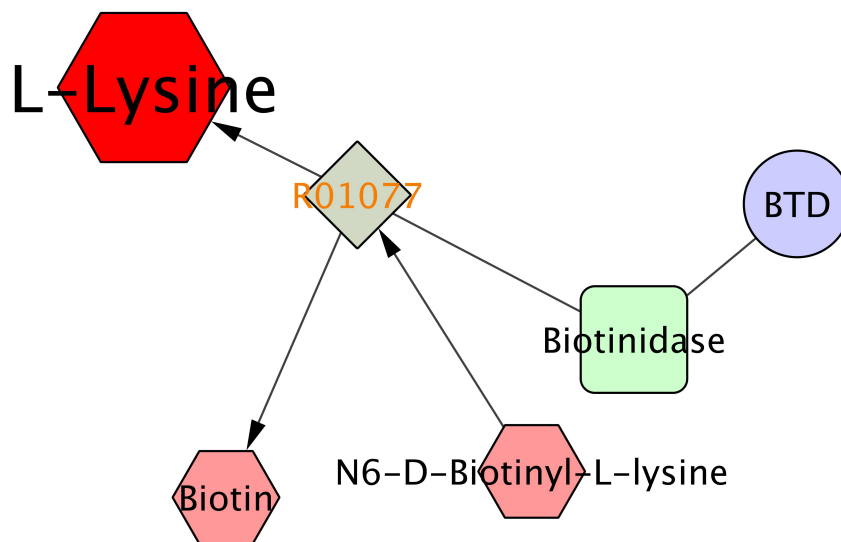

Donkey

# Pentose phosphate pathway

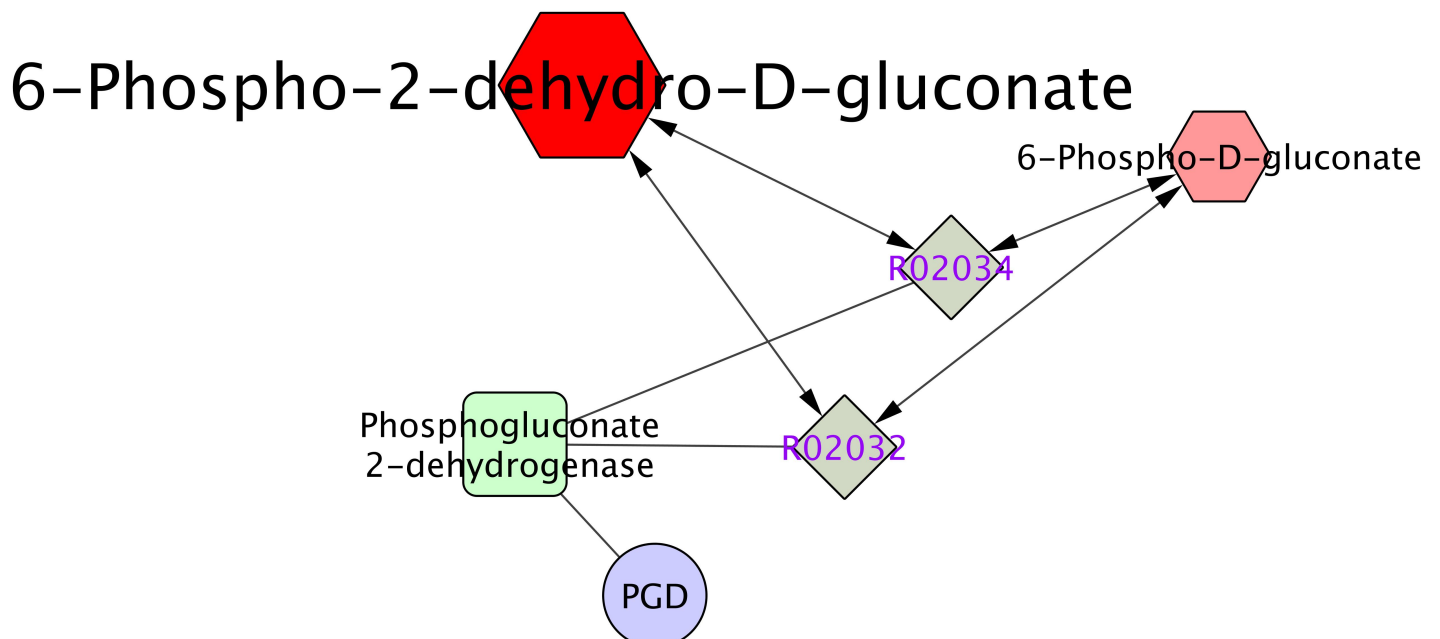

Figure S7

# Vitamin H (biotin) metabolism

Cow

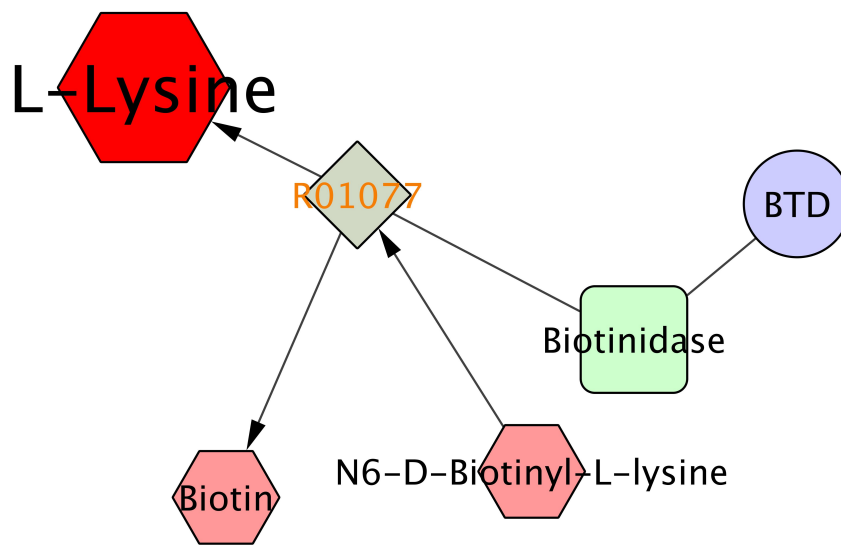

Donkey

# Pentose phosphate pathway



Figure S7

# Glycine, serine, alanine and threonine metabolism

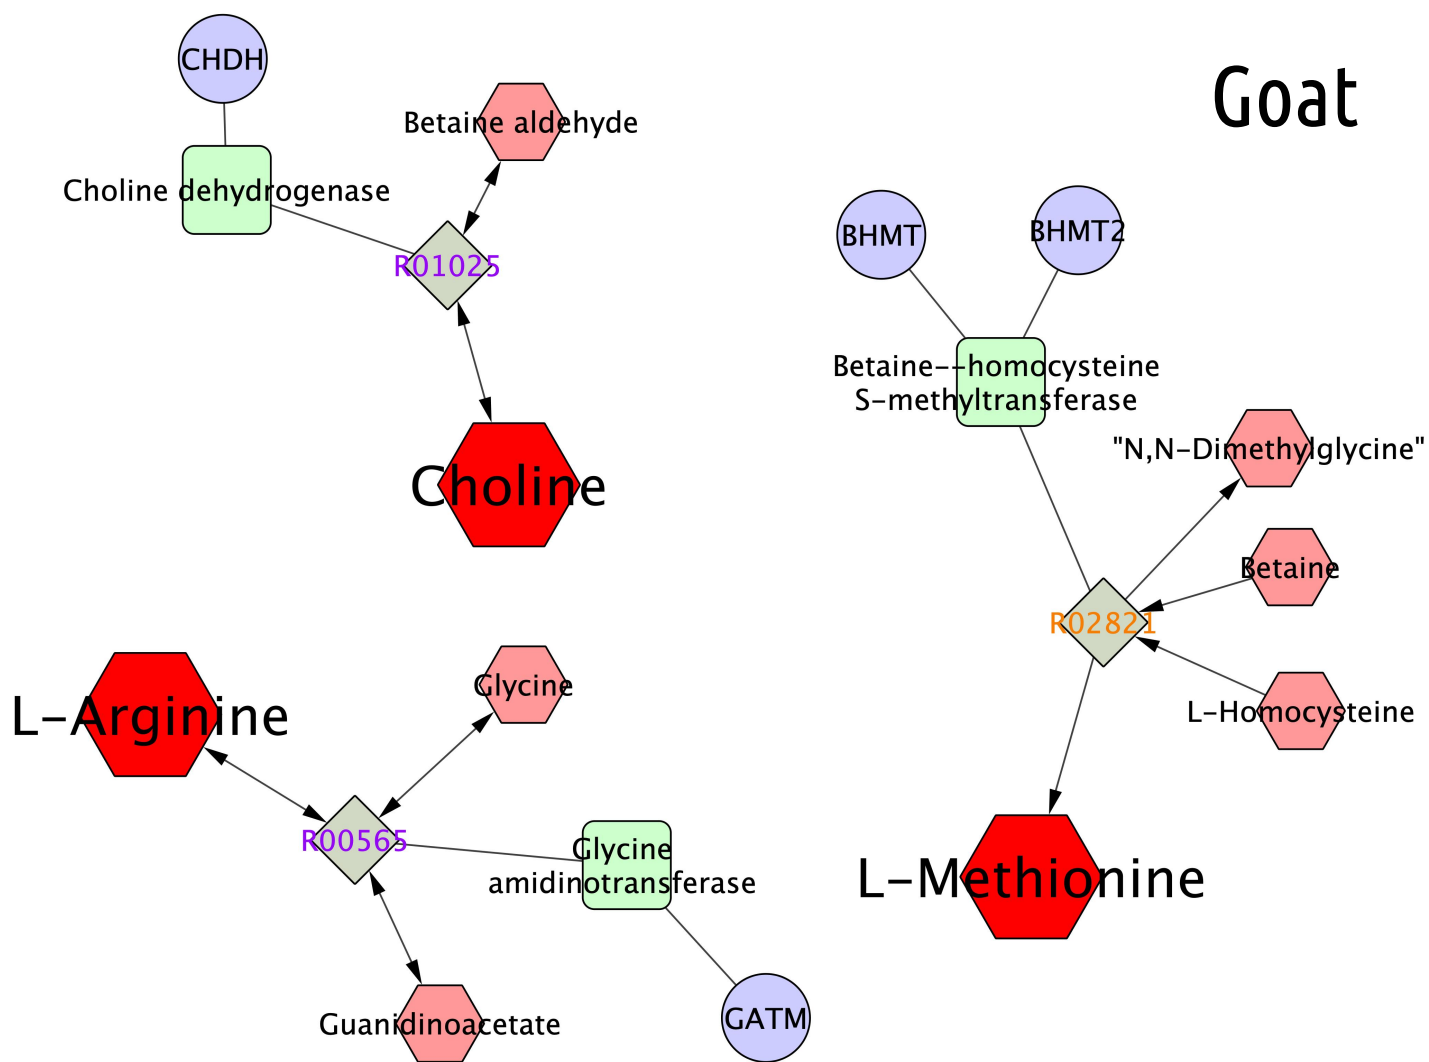

# Glycolysis and Gluconeogenesis

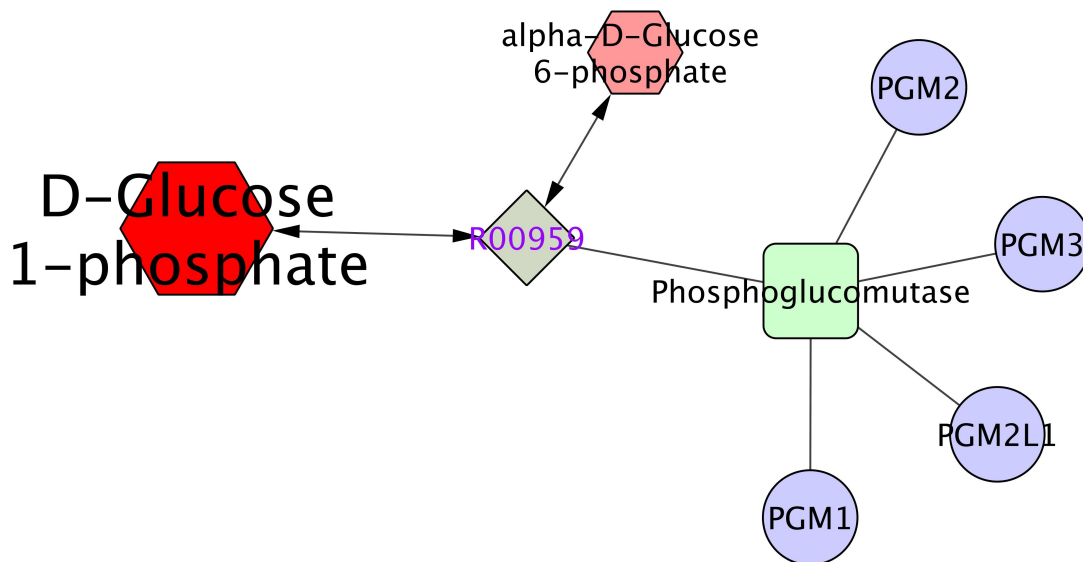

### Figure S7

# Goat

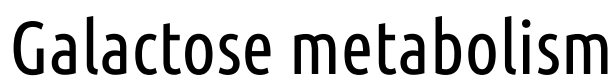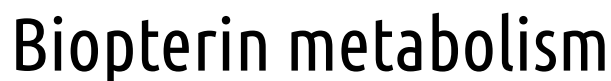

### Figure S7
