# Supplementary material for: Anti-Inflammatory Potential of Cow, Donkey and Goat Milk Extracellular Vesicles as Revealed by Metabolomic Profile
Source: MDPI journal article supplement (doi:10.3390/nu12102908), 2020-09-23
Supplement: s1 [file s1]

# Donkey

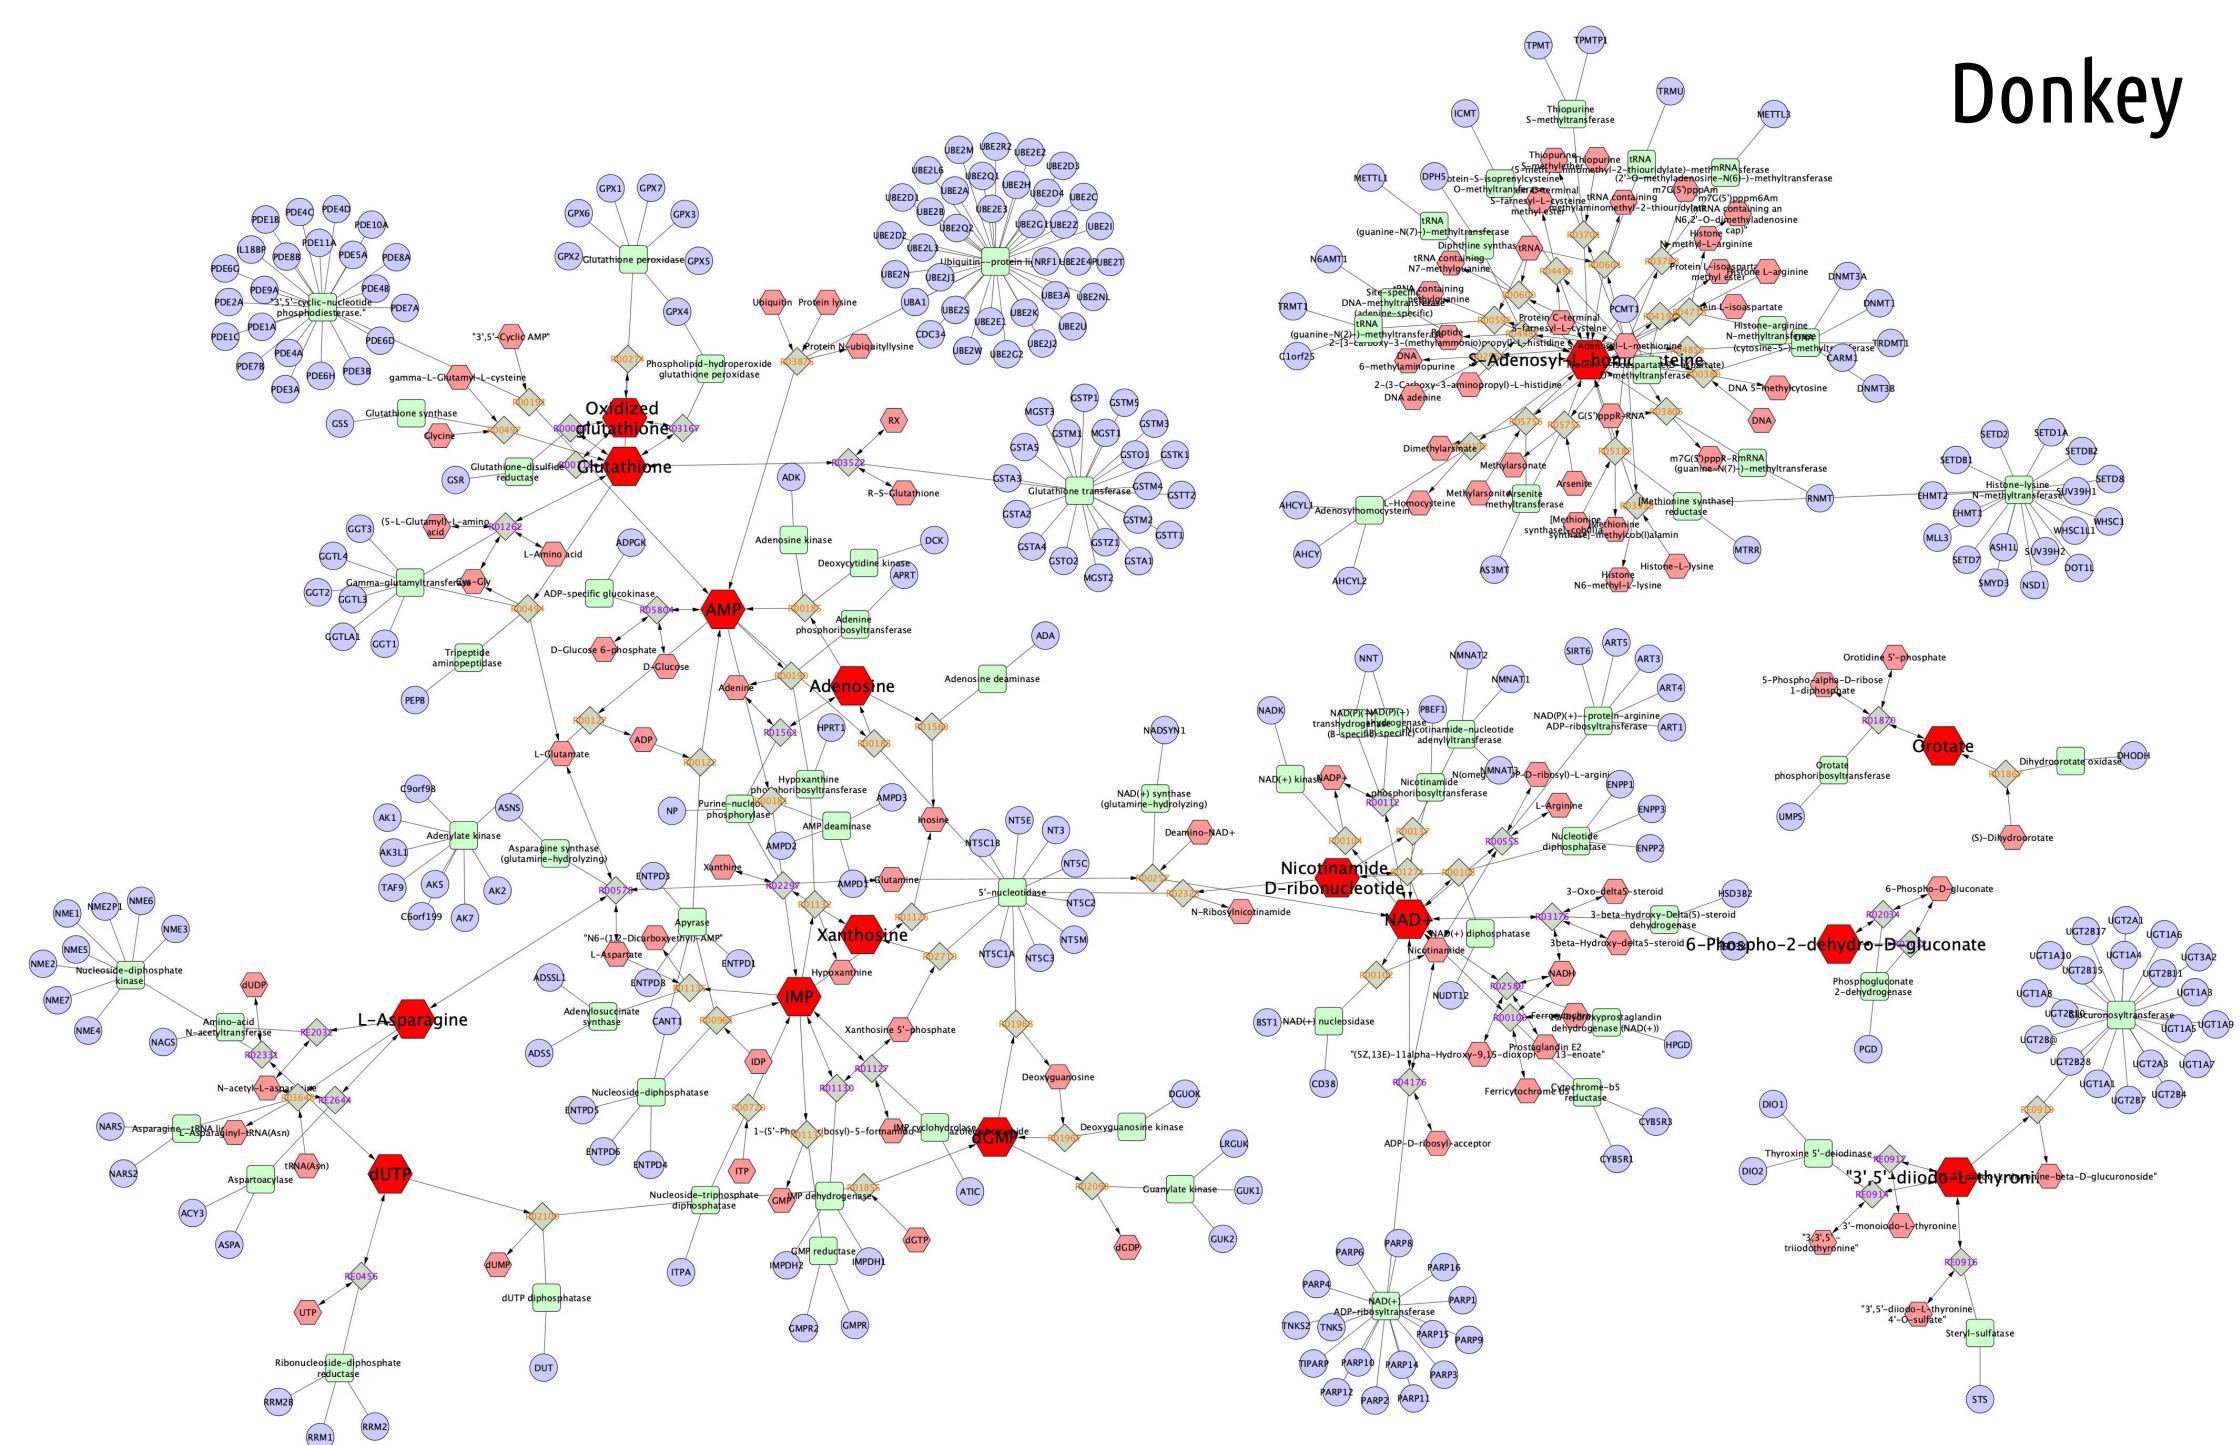

**Figure S10.** Donkey total compound-reaction-enzyme. Network of metabolites highly expressed in MEVs.
