# Supplementary material for: Anti-Inflammatory Potential of Cow, Donkey and Goat Milk Extracellular Vesicles as Revealed by Metabolomic Profile
Source: Nutrients. 2020 Sep 23;12(10):2908. doi: 10.3390/nu12102908 (PMC7598260; doi:10.3390/nu12102908)
Supplement: Supplementary file 1 [file nutrients-12-02908-s001.zip]

Archive with 12 entries (12 files):
- Supplementary/FigS1.pdf
- Supplementary/FigS10.pdf
- Supplementary/FigS2.pdf
- Supplementary/FigS3.pdf
- Supplementary/FigS4.pdf
- Supplementary/FigS5.pdf
- Supplementary/FigS6.pdf
- Supplementary/FigS7.pdf
- Supplementary/FigS8.pdf
- Supplementary/FigS9.pdf
- Supplementary/TableS1.xlsx
- Supplementary/TableS2.xlsx
