# Supplementary material for: Anti-Inflammatory Potential of Cow, Donkey and Goat Milk Extracellular Vesicles as Revealed by Metabolomic Profile
Source: Nutrients. 2020 Sep 23;12(10):2908. doi: 10.3390/nu12102908 (PMC7598260; doi:10.3390/nu12102908)
Supplement: Supplementary file 1 [file nutrients-12-02908-s001.zip › Supplementary/TableS1.xlsx]

## Sheet: Foglio1
	Supplementary Table 1. Raw data (quantitative relative ion count) were normalized using the Pareto Scaling normalization using MetaboAnalyst. For each milk (Bovine, Donkey and Goat) four samples were analyzed. Mean, meadian and standard deviation (SD) for five fraction (P1-P2) of normalized values for each milk are reported in the table below. Only metabolites enriched in the P2 fraction of each …
	Donkey															Bovine															Goat
	P1			P2			P3			P4			P5			P1			P2			P3			P4			P5			P1			P2			P3			P4			P5
Label	MEAN	MEDIAN	SD	MEAN	MEDIAN	SD	MEAN	MEDIAN	SD	MEAN	MEDIAN	SD	MEAN	MEDIAN	SD	MEAN	MEDIAN	SD	MEAN	MEDIAN	SD	MEAN	MEDIAN	SD	MEAN	MEDIAN	SD	MEAN	MEDIAN	SD	MEAN	MEDIAN	SD	MEAN	MEDIAN	SD	MEAN	MEDIAN	SD	MEAN	MEDIAN	SD	MEAN	MEDIAN	SD
2-dehydro-D-gluconate	-0.171551	-0.197932	0.206168	0.614641	0.385442	0.768202	0.0131343	0.00243339	0.217087	-0.347404	-0.327864	0.110206	-0.108821	-0.0954373	0.0925679	n.s.	n.s.	n.s.	n.s.	n.s.	n.s.	n.s.	n.s.	n.s.	n.s.	n.s.	n.s.	n.s.	n.s.	n.s.	n.s.	n.s.	n.s.	n.s.	n.s.	n.s.	n.s.	n.s.	n.s.	n.s.	n.s.	n.s.	n.s.	n.s.	n.s.
adenosine	-1.85617	-1.60542	1.15077	6.95074	6.63108	8.12696	-2.33728	-2.42652	0.271462	-0.969726	-1.05821	0.974615	-1.78757	-1.872	1.12468	-5.04622	-5.02133	0.412174	21.6526	21.3479	3.01292	-5.5888	-5.51819	0.242858	-5.71208	-5.71411	0.107793	-5.30546	-5.31126	0.0800548	1.62844	1.4938	1.29454	14.5451	13.4997	2.67633	-4.71159	-4.84454	0.968214	-5.63979	-5.63835	0.184109	-5.82215	-5.83936	0.0686474
AMP	-0.954732	-0.977579	0.0543837	3.9607	3.93759	1.22378	-1.01599	-1.01618	0.000799487	-0.981634	-0.989325	0.0407513	-1.00835	-1.01121	0.0104743	n.s.	n.s.	n.s.	n.s.	n.s.	n.s.	n.s.	n.s.	n.s.	n.s.	n.s.	n.s.	n.s.	n.s.	n.s.	-0.0352463	-0.0637358	0.254604	1.59103	1.55113	0.208206	-0.330311	-0.335548	0.288859	-0.593834	-0.594116	0.0267633	-0.631634	-0.64717	0.0566041
asparagine	-1.04338	-1.07292	0.218756	3.72935	3.34506	2.54565	-0.279747	-0.240659	0.336047	-1.52783	-1.53851	0.0389571	-0.878387	-0.870978	0.249425	n.s.	n.s.	n.s.	n.s.	n.s.	n.s.	n.s.	n.s.	n.s.	n.s.	n.s.	n.s.	n.s.	n.s.	n.s.	n.s.	n.s.	n.s.	n.s.	n.s.	n.s.	n.s.	n.s.	n.s.	n.s.	n.s.	n.s.	n.s.	n.s.	n.s.
dGMP	-0.954732	-0.977579	0.0543837	3.9607	3.93759	1.22378	-1.01599	-1.01618	0.000799487	-0.981634	-0.989325	0.0407513	-1.00835	-1.01121	0.0104743	n.s.	n.s.	n.s.	n.s.	n.s.	n.s.	n.s.	n.s.	n.s.	n.s.	n.s.	n.s.	n.s.	n.s.	n.s.	-0.0352463	-0.0637358	0.254604	1.59103	1.55113	0.208206	-0.330311	-0.335548	0.288859	-0.593834	-0.594116	0.0267633	-0.631634	-0.64717	0.0566041
Diiodothyronine	-0.2078	-0.208968	0.0132006	0.868507	0.91004	0.680996	-0.219296	-0.220068	0.00320416	-0.219489	-0.222565	0.0140021	-0.221922	-0.221737	0.00307501	n.s.	n.s.	n.s.	n.s.	n.s.	n.s.	n.s.	n.s.	n.s.	n.s.	n.s.	n.s.	n.s.	n.s.	n.s.	-0.296948	-0.297018	0.00200406	0.733574	0.720243	0.178894	-0.269709	-0.288303	0.0454754	-0.200918	-0.217317	0.0748643	0.0340003	-0.0121041	0.312295
dUTP	-0.578279	-0.602621	0.0516437	2.35127	2.2182	0.995356	-0.581989	-0.594106	0.0356959	-0.59275	-0.595743	0.0116729	-0.598248	-0.598072	0.0105013	n.s.	n.s.	n.s.	n.s.	n.s.	n.s.	n.s.	n.s.	n.s.	n.s.	n.s.	n.s.	n.s.	n.s.	n.s.	n.s.	n.s.	n.s.	n.s.	n.s.	n.s.	n.s.	n.s.	n.s.	n.s.	n.s.	n.s.	n.s.	n.s.	n.s.
glutathione	-1.13029	-1.13001	0.0937383	4.65731	4.6438	1.54337	-1.17722	-1.19548	0.0740832	-1.18435	-1.19052	0.0561061	-1.16544	-1.18352	0.0886305	n.s.	n.s.	n.s.	n.s.	n.s.	n.s.	n.s.	n.s.	n.s.	n.s.	n.s.	n.s.	n.s.	n.s.	n.s.	n.s.	n.s.	n.s.	n.s.	n.s.	n.s.	n.s.	n.s.	n.s.	n.s.	n.s.	n.s.	n.s.	n.s.	n.s.
glutathione disulfide	-0.855354	-0.894356	0.0959395	3.60588	3.46497	0.885577	-0.91447	-0.916884	0.005842	-0.917809	-0.918261	0.0029748	-0.918248	-0.918197	0.000851169	n.s.	n.s.	n.s.	n.s.	n.s.	n.s.	n.s.	n.s.	n.s.	n.s.	n.s.	n.s.	n.s.	n.s.	n.s.	-0.298169	-0.311198	0.0273621	1.25215	1.15613	0.658872	-0.307164	-0.313176	0.017805	-0.322964	-0.322901	0.00270135	-0.323849	-0.323662	0.000978224
IMP	-0.233061	-0.265257	0.0725982	1.07179	1.18767	0.559969	-0.276497	-0.277174	0.00281166	-0.283434	-0.285288	0.00534659	-0.278802	-0.278639	0.00269833	-0.298791	-0.298891	0.00140059	1.21831	1.08589	0.579041	-0.304241	-0.304638	0.00144861	-0.303972	-0.30458	0.00898486	-0.311305	-0.3113	0.000104803	n.s.	n.s.	n.s.	n.s.	n.s.	n.s.	n.s.	n.s.	n.s.	n.s.	n.s.	n.s.	n.s.	n.s.	n.s.
NAD+	-0.660302	-0.694944	0.0824434	2.8058	2.57978	0.862695	-0.713537	-0.713809	0.00112862	-0.717502	-0.717513	0.000507796	-0.714462	-0.714397	0.00108313	-1.23352	-1.23354	0.000353676	4.9139	5.00639	1.95203	-1.21077	-1.21596	0.0243939	-1.23482	-1.23498	0.00226886	-1.23479	-1.23665	0.00376297	-0.447952	-0.447984	0.000910211	1.78571	1.70868	0.369008	-0.425145	-0.425496	0.0179753	-0.455976	-0.455928	0.00202013	-0.456637	-0.456497	0.000731536
Nicotinamide ribotide	-0.0410618	-0.0668135	0.167307	0.590991	0.486633	0.626951	-0.168881	-0.178542	0.0230511	-0.196117	-0.19616	0.00186877	-0.184931	-0.184692	0.00398611	-0.413484	-0.413557	0.00102753	1.65908	1.28928	0.794614	-0.409398	-0.416938	0.0161015	-0.417285	-0.417731	0.00659168	-0.418916	-0.422661	0.00755002	n.s.	n.s.	n.s.	n.s.	n.s.	n.s.	n.s.	n.s.	n.s.	n.s.	n.s.	n.s.	n.s.	n.s.	n.s.
orotate	-0.126455	-0.231553	0.40803	1.02382	0.925901	0.747938	-0.218877	-0.299894	0.279265	-0.300063	-0.288813	0.128327	-0.378427	-0.421911	0.120712	n.s.	n.s.	n.s.	n.s.	n.s.	n.s.	n.s.	n.s.	n.s.	n.s.	n.s.	n.s.	n.s.	n.s.	n.s.	n.s.	n.s.	n.s.	n.s.	n.s.	n.s.	n.s.	n.s.	n.s.	n.s.	n.s.	n.s.	n.s.	n.s.	n.s.
S-adenosyl-L-homoCysteine	-0.00544473	-0.0103172	0.289872	0.751942	0.873913	0.534189	-0.292781	-0.301429	0.0376024	-0.176137	-0.184368	0.158392	-0.277579	-0.28203	0.0177452	n.s.	n.s.	n.s.	n.s.	n.s.	n.s.	n.s.	n.s.	n.s.	n.s.	n.s.	n.s.	n.s.	n.s.	n.s.	n.s.	n.s.	n.s.	n.s.	n.s.	n.s.	n.s.	n.s.	n.s.	n.s.	n.s.	n.s.	n.s.	n.s.	n.s.
xanthosine	-0.0980138	-0.110483	0.0991493	0.718645	0.812382	0.631384	-0.189494	-0.220068	0.0647191	-0.251505	-0.246337	0.0158814	-0.179633	-0.183037	0.0461514	n.s.	n.s.	n.s.	n.s.	n.s.	n.s.	n.s.	n.s.	n.s.	n.s.	n.s.	n.s.	n.s.	n.s.	n.s.	-0.226287	-0.228703	0.069467	0.84789	0.956253	0.42781	-0.197247	-0.202658	0.0263102	-0.229364	-0.233497	0.0212756	-0.194991	-0.187257	0.0609278
adenine	n.s.	n.s.	n.s.	n.s.	n.s.	n.s.	n.s.	n.s.	n.s.	n.s.	n.s.	n.s.	n.s.	n.s.	n.s.	-0.957104	-1.02644	0.363564	5.47948	5.31302	0.957898	-1.49394	-1.56559	0.153709	-1.43682	-1.47578	0.236867	-1.59162	-1.61214	0.075119	n.s.	n.s.	n.s.	n.s.	n.s.	n.s.	n.s.	n.s.	n.s.	n.s.	n.s.	n.s.	n.s.	n.s.	n.s.
allantoin	n.s.	n.s.	n.s.	n.s.	n.s.	n.s.	n.s.	n.s.	n.s.	n.s.	n.s.	n.s.	n.s.	n.s.	n.s.	0.104487	0.0669608	0.706884	1.28243	1.62276	1.27022	-0.50951	-0.515678	0.0159462	-0.450899	-0.45138	0.0607062	-0.426512	-0.42759	0.0276896	n.s.	n.s.	n.s.	n.s.	n.s.	n.s.	n.s.	n.s.	n.s.	n.s.	n.s.	n.s.	n.s.	n.s.	n.s.
cytosine	n.s.	n.s.	n.s.	n.s.	n.s.	n.s.	n.s.	n.s.	n.s.	n.s.	n.s.	n.s.	n.s.	n.s.	n.s.	-1.55201	-1.60958	0.180903	3.54784	3.8502	1.45639	-0.552891	-0.551349	0.423323	-0.60273	-0.608169	1.21177	-0.840209	-0.922966	1.21592	-1.78674	-1.82163	0.219058	4.1465	4.31236	1.19861	-1.3251	-1.50333	0.499635	-0.909505	-1.06662	0.650111	-0.125163	-0.440431	0.736384
deoxyinosine	n.s.	n.s.	n.s.	n.s.	n.s.	n.s.	n.s.	n.s.	n.s.	n.s.	n.s.	n.s.	n.s.	n.s.	n.s.	-0.0471032	-0.125764	0.159613	0.465329	0.544217	0.251307	-0.138992	-0.139974	0.00358183	-0.138327	-0.13983	0.0222159	-0.140907	-0.156246	0.030904	-0.0801424	-0.0803006	0.00450446	0.289065	0.365715	0.258785	-0.049392	-0.0994312	0.112644	-0.0884429	-0.0963133	0.0295553	-0.0710879	-0.0717158	0.0408194
FMN	n.s.	n.s.	n.s.	n.s.	n.s.	n.s.	n.s.	n.s.	n.s.	n.s.	n.s.	n.s.	n.s.	n.s.	n.s.	-0.178332	-0.252962	0.150697	0.797443	0.750426	0.262664	-0.206006	-0.209929	0.0626637	-0.232378	-0.231978	0.0192305	-0.180727	-0.194798	0.0616015	n.s.	n.s.	n.s.	n.s.	n.s.	n.s.	n.s.	n.s.	n.s.	n.s.	n.s.	n.s.	n.s.	n.s.	n.s.
GMP	n.s.	n.s.	n.s.	n.s.	n.s.	n.s.	n.s.	n.s.	n.s.	n.s.	n.s.	n.s.	n.s.	n.s.	n.s.	-0.953907	-0.953939	0.000447932	3.80396	3.84048	1.82983	-0.936581	-0.935678	0.00558706	-0.955564	-0.955758	0.00287352	-0.957909	-0.957907	3.3518e-05	n.s.	n.s.	n.s.	n.s.	n.s.	n.s.	n.s.	n.s.	n.s.	n.s.	n.s.	n.s.	n.s.	n.s.	n.s.
guanosine	n.s.	n.s.	n.s.	n.s.	n.s.	n.s.	n.s.	n.s.	n.s.	n.s.	n.s.	n.s.	n.s.	n.s.	n.s.	-1.50719	-1.53398	0.349368	7.38955	7.51896	1.42327	-1.87835	-1.89018	0.199242	-1.98046	-1.9822	0.104855	-2.02355	-2.05758	0.122209	n.s.	n.s.	n.s.	n.s.	n.s.	n.s.	n.s.	n.s.	n.s.	n.s.	n.s.	n.s.	n.s.	n.s.	n.s.
inosine	n.s.	n.s.	n.s.	n.s.	n.s.	n.s.	n.s.	n.s.	n.s.	n.s.	n.s.	n.s.	n.s.	n.s.	n.s.	-0.590199	-0.591298	0.146377	2.81706	2.91466	0.347425	-0.815098	-0.814966	0.0135184	-0.73089	-0.742603	0.108544	-0.680869	-0.684249	0.011938	n.s.	n.s.	n.s.	n.s.	n.s.	n.s.	n.s.	n.s.	n.s.	n.s.	n.s.	n.s.	n.s.	n.s.	n.s.
lysine	n.s.	n.s.	n.s.	n.s.	n.s.	n.s.	n.s.	n.s.	n.s.	n.s.	n.s.	n.s.	n.s.	n.s.	n.s.	0.0629106	0.199777	0.340016	1.74417	1.87061	0.510492	-0.0526602	0.0911692	0.397748	-0.253139	-0.296272	0.973379	-1.50128	-1.50097	0.0710038	n.s.	n.s.	n.s.	n.s.	n.s.	n.s.	n.s.	n.s.	n.s.	n.s.	n.s.	n.s.	n.s.	n.s.	n.s.
NADH	n.s.	n.s.	n.s.	n.s.	n.s.	n.s.	n.s.	n.s.	n.s.	n.s.	n.s.	n.s.	n.s.	n.s.	n.s.	-0.283719	-0.283829	0.00154455	1.1604	1.15334	0.255996	-0.289729	-0.290167	0.00159752	-0.289432	-0.290103	0.00990842	-0.297519	-0.297513	0.000115576	-0.0708525	-0.0709976	0.00413117	0.371982	0.371258	0.180206	-0.0885183	-0.0885429	0.01682	-0.102339	-0.0993767	0.00797136	-0.110272	-0.109637	0.00332022
NADP+	n.s.	n.s.	n.s.	n.s.	n.s.	n.s.	n.s.	n.s.	n.s.	n.s.	n.s.	n.s.	n.s.	n.s.	n.s.	-0.255236	-0.255352	0.001631	1.01827	1.06185	0.581298	-0.261582	-0.262045	0.00168693	-0.231643	-0.261977	0.0668929	-0.269808	-0.269802	0.000122045	n.s.	n.s.	n.s.	n.s.	n.s.	n.s.	n.s.	n.s.	n.s.	n.s.	n.s.	n.s.	n.s.	n.s.	n.s.
Pyridoxamine	n.s.	n.s.	n.s.	n.s.	n.s.	n.s.	n.s.	n.s.	n.s.	n.s.	n.s.	n.s.	n.s.	n.s.	n.s.	-0.233933	-0.297377	0.320931	0.970802	1.03491	0.244345	-0.295626	-0.291734	0.0746662	0.0562516	0.0161572	0.485529	-0.497495	-0.510362	0.0258281	n.s.	n.s.	n.s.	n.s.	n.s.	n.s.	n.s.	n.s.	n.s.	n.s.	n.s.	n.s.	n.s.	n.s.	n.s.
5-methyl-THF	n.s.	n.s.	n.s.	n.s.	n.s.	n.s.	n.s.	n.s.	n.s.	n.s.	n.s.	n.s.	n.s.	n.s.	n.s.	n.s.	n.s.	n.s.	n.s.	n.s.	n.s.	n.s.	n.s.	n.s.	n.s.	n.s.	n.s.	n.s.	n.s.	n.s.	-0.328292	-0.266792	0.647526	4.35784	4.28978	0.382571	-1.6248	-1.7885	0.340331	-1.3849	-1.54649	0.483083	-1.01986	-1.15586	0.607442
Acetyllysine	n.s.	n.s.	n.s.	n.s.	n.s.	n.s.	n.s.	n.s.	n.s.	n.s.	n.s.	n.s.	n.s.	n.s.	n.s.	n.s.	n.s.	n.s.	n.s.	n.s.	n.s.	n.s.	n.s.	n.s.	n.s.	n.s.	n.s.	n.s.	n.s.	n.s.	-0.0103753	-0.0502803	0.226735	3.29885	3.49296	0.586376	-1.13936	-1.14138	0.025166	-1.11178	-1.12178	0.0366308	-1.03734	-1.05671	0.0715124
arginine	n.s.	n.s.	n.s.	n.s.	n.s.	n.s.	n.s.	n.s.	n.s.	n.s.	n.s.	n.s.	n.s.	n.s.	n.s.	n.s.	n.s.	n.s.	n.s.	n.s.	n.s.	n.s.	n.s.	n.s.	n.s.	n.s.	n.s.	n.s.	n.s.	n.s.	-1.81561	-1.80068	0.255374	2.95686	2.91393	2.82475	-1.25993	-1.40984	0.624446	-0.756142	-1.02908	0.970278	0.874825	0.639599	0.878329
choline	n.s.	n.s.	n.s.	n.s.	n.s.	n.s.	n.s.	n.s.	n.s.	n.s.	n.s.	n.s.	n.s.	n.s.	n.s.	n.s.	n.s.	n.s.	n.s.	n.s.	n.s.	n.s.	n.s.	n.s.	n.s.	n.s.	n.s.	n.s.	n.s.	n.s.	-0.590544	-0.595934	0.0118037	0.695406	0.606197	0.189002	-0.178188	-0.201493	0.421869	-0.0296413	-0.0620602	0.584871	0.102967	-0.0110728	0.359054
dTMP	n.s.	n.s.	n.s.	n.s.	n.s.	n.s.	n.s.	n.s.	n.s.	n.s.	n.s.	n.s.	n.s.	n.s.	n.s.	n.s.	n.s.	n.s.	n.s.	n.s.	n.s.	n.s.	n.s.	n.s.	n.s.	n.s.	n.s.	n.s.	n.s.	n.s.	-0.196652	-0.19673	0.00222277	0.725113	0.759931	0.185748	-0.164437	-0.172583	0.0363974	-0.18139	-0.179761	0.0284009	-0.182634	-0.186243	0.0237931
dUMP	n.s.	n.s.	n.s.	n.s.	n.s.	n.s.	n.s.	n.s.	n.s.	n.s.	n.s.	n.s.	n.s.	n.s.	n.s.	n.s.	n.s.	n.s.	n.s.	n.s.	n.s.	n.s.	n.s.	n.s.	n.s.	n.s.	n.s.	n.s.	n.s.	n.s.	-0.0071579	-0.0624663	0.116697	0.300074	0.285445	0.100179	-0.0687526	-0.0705034	0.0296891	-0.110284	-0.110026	0.0109781	-0.11388	-0.113119	0.00397544
glucose-1-phosphate	n.s.	n.s.	n.s.	n.s.	n.s.	n.s.	n.s.	n.s.	n.s.	n.s.	n.s.	n.s.	n.s.	n.s.	n.s.	n.s.	n.s.	n.s.	n.s.	n.s.	n.s.	n.s.	n.s.	n.s.	n.s.	n.s.	n.s.	n.s.	n.s.	n.s.	-0.0404913	-0.410318	2.30528	2.59829	2.78329	1.24739	0.754697	0.84391	1.60348	-1.23583	-1.61166	1.24583	-2.07667	-2.11389	0.348046
glucose-6-phosphate	n.s.	n.s.	n.s.	n.s.	n.s.	n.s.	n.s.	n.s.	n.s.	n.s.	n.s.	n.s.	n.s.	n.s.	n.s.	n.s.	n.s.	n.s.	n.s.	n.s.	n.s.	n.s.	n.s.	n.s.	n.s.	n.s.	n.s.	n.s.	n.s.	n.s.	-0.0404913	-0.410318	2.30528	2.59829	2.78329	1.24739	0.754697	0.84391	1.60348	-1.23583	-1.61166	1.24583	-2.07667	-2.11389	0.348046
guanine	n.s.	n.s.	n.s.	n.s.	n.s.	n.s.	n.s.	n.s.	n.s.	n.s.	n.s.	n.s.	n.s.	n.s.	n.s.	n.s.	n.s.	n.s.	n.s.	n.s.	n.s.	n.s.	n.s.	n.s.	n.s.	n.s.	n.s.	n.s.	n.s.	n.s.	-0.677266	-0.683766	0.0654248	1.40958	1.32948	0.270845	-0.165264	-0.060304	0.256296	-0.277483	-0.288747	0.0267184	-0.289569	-0.246449	0.194018
Indoleacrylic acid	n.s.	n.s.	n.s.	n.s.	n.s.	n.s.	n.s.	n.s.	n.s.	n.s.	n.s.	n.s.	n.s.	n.s.	n.s.	n.s.	n.s.	n.s.	n.s.	n.s.	n.s.	n.s.	n.s.	n.s.	n.s.	n.s.	n.s.	n.s.	n.s.	n.s.	-0.247376	-0.428217	0.51284	3.43081	3.60242	0.460143	-1.06668	-1.12778	0.271931	-1.38683	-1.35779	0.212673	-0.729918	-0.580676	0.498338
methionine	n.s.	n.s.	n.s.	n.s.	n.s.	n.s.	n.s.	n.s.	n.s.	n.s.	n.s.	n.s.	n.s.	n.s.	n.s.	n.s.	n.s.	n.s.	n.s.	n.s.	n.s.	n.s.	n.s.	n.s.	n.s.	n.s.	n.s.	n.s.	n.s.	n.s.	-1.25688	-1.4736	0.847689	2.97705	2.54692	1.82146	-1.53534	-1.62693	0.258431	-0.834886	-1.18004	0.999785	0.650055	-0.480465	2.54969
Methionine sulfoxide	n.s.	n.s.	n.s.	n.s.	n.s.	n.s.	n.s.	n.s.	n.s.	n.s.	n.s.	n.s.	n.s.	n.s.	n.s.	n.s.	n.s.	n.s.	n.s.	n.s.	n.s.	n.s.	n.s.	n.s.	n.s.	n.s.	n.s.	n.s.	n.s.	n.s.	-0.333994	-0.334055	0.0017514	0.842318	0.988489	0.343896	3.44198e-05	-0.114228	0.282452	-0.263151	-0.288083	0.0707029	-0.245208	-0.229001	0.0474592
phenylalanine	n.s.	n.s.	n.s.	n.s.	n.s.	n.s.	n.s.	n.s.	n.s.	n.s.	n.s.	n.s.	n.s.	n.s.	n.s.	n.s.	n.s.	n.s.	n.s.	n.s.	n.s.	n.s.	n.s.	n.s.	n.s.	n.s.	n.s.	n.s.	n.s.	n.s.	-1.61749	-1.41034	1.11588	12.6194	12.3934	1.94725	-4.1206	-4.33552	3.14974	-3.3721	-3.15595	2.937	-3.50922	-5.17587	4.54334
S-methyl-5--thioadenosine	n.s.	n.s.	n.s.	n.s.	n.s.	n.s.	n.s.	n.s.	n.s.	n.s.	n.s.	n.s.	n.s.	n.s.	n.s.	n.s.	n.s.	n.s.	n.s.	n.s.	n.s.	n.s.	n.s.	n.s.	n.s.	n.s.	n.s.	n.s.	n.s.	n.s.	-0.248288	-0.225166	0.230095	1.16495	1.17446	0.230052	-0.233872	-0.2607	0.100291	-0.203181	-0.208861	0.111106	-0.479606	-0.477945	0.05998
tryptophan	n.s.	n.s.	n.s.	n.s.	n.s.	n.s.	n.s.	n.s.	n.s.	n.s.	n.s.	n.s.	n.s.	n.s.	n.s.	n.s.	n.s.	n.s.	n.s.	n.s.	n.s.	n.s.	n.s.	n.s.	n.s.	n.s.	n.s.	n.s.	n.s.	n.s.	-0.56628	-0.692421	1.24531	7.64379	7.64168	0.684993	-2.61193	-2.31308	0.669239	-2.51561	-2.43697	0.939747	-1.94997	-1.62318	1.21901
tyrosine	n.s.	n.s.	n.s.	n.s.	n.s.	n.s.	n.s.	n.s.	n.s.	n.s.	n.s.	n.s.	n.s.	n.s.	n.s.	n.s.	n.s.	n.s.	n.s.	n.s.	n.s.	n.s.	n.s.	n.s.	n.s.	n.s.	n.s.	n.s.	n.s.	n.s.	-0.736419	-0.800267	0.626323	7.94788	8.14763	3.86938	-1.7282	-1.72277	1.84477	-2.87726	-3.88647	2.23676	-2.60599	-3.87055	2.74262
uridine	n.s.	n.s.	n.s.	n.s.	n.s.	n.s.	n.s.	n.s.	n.s.	n.s.	n.s.	n.s.	n.s.	n.s.	n.s.	n.s.	n.s.	n.s.	n.s.	n.s.	n.s.	n.s.	n.s.	n.s.	n.s.	n.s.	n.s.	n.s.	n.s.	n.s.	-1.59808	-1.47548	0.432991	4.07648	3.9644	0.870951	-1.86162	-1.9975	1.57443	-0.780895	-0.461252	1.87951	0.164114	-0.0652482	1.05417
