# Supplementary material for: Anti-Inflammatory Potential of Cow, Donkey and Goat Milk Extracellular Vesicles as Revealed by Metabolomic Profile
Source: Nutrients. 2020 Sep 23;12(10):2908. doi: 10.3390/nu12102908 (PMC7598260; doi:10.3390/nu12102908)
Supplement: Supplementary file 1 [file nutrients-12-02908-s001.zip › Supplementary/TableS2.xlsx]

## Sheet: Metabolites
Supplementary Table 2. List of metabolites found in P2 fractions in Donkey, Goat and Bovine milks. Metabolites with significant FDR values were reported for each milk. If a metabolite is not present in a milk, the “n.s.” string (“not significant”) is used. The columns “Fisher’s LSD” reports the post-hoc tests after the ANOVA analysis, indicating the significance between pairs of fractions. Only m…
	Donkey			Goat			Bovine
	p.value	FDR	Fisher's LSD	p.value	FDR	Fisher's LSD	p.value	FDR	Fisher's LSD
2-dehydro-D-gluconate	0.024	0.046	P2 - P1; P2 - P3; P2 - P4; P2 - P5	n.s.	n.s.	n.s.	n.s.	n.s.	n.s.
5-methyl-THF	n.s.	n.s.	n.s.	1.7e-10	3.5E-09	P2 - P1; P1 - P3; P1 - P4; P2 - P3; P2 - P4; P2 - P5	n.s.	n.s.	n.s.
Acetyllysine	n.s.	n.s.	n.s.	1.8e-12	2.2e-10	P2 - P1; P1 - P3; P1 - P4; P1 - P5; P2 - P3; P2 - P4; P2 - P5	n.s.	n.s.	n.s.
adenine	n.s.	n.s.	n.s.	n.s.	n.s.	n.s.	1.6e-13	6.3e-12	P2 - P1; P2 - P3; P2 - P4; P2 - P5
adenosine	0.015	0.032	P2 - P1; P2 - P3; P2 - P4; P2 - P5	5.5e-12	3.4e-10	P2 - P1; P1 - P3; P1 - P4; P1 - P5; P2 - P3; P2 - P4; P2 - P5	4.6e-16	4.9e-14	P2 - P1; P2 - P3; P2 - P4; P2 - P5
allantoin	n.s.	n.s.	n.s.	n.s.	n.s.	n.s.	0.0034	0.01	P2 - P1; P2 - P3; P2 - P4; P2 - P5
AMP	2.6e-09	6.8e-08	P2 - P1; P2 - P3; P2 - P4; P2 - P5	3.5e-10	4.4e-09	P2 - P1; P1 - P4; P1 - P5; P2 - P3; P2 - P4; P2 - P5; P3 - P5	n.s.	n.s.	n.s.
arginine	n.s.	n.s.	n.s.	0.0017	0.0035	P2 - P1; P5 - P1; P2 - P3; P2 - P4	n.s.	n.s.	n.s.
asparagine	7.2e-05	0.00046	P2 - P1; P2 - P3; P2 - P4; P2 - P5	n.s.	n.s.	n.s.	n.s.	n.s.	n.s.
choline	n.s.	n.s.	n.s.	0.0033	0.006	P2 - P1; P4 - P1; P5 - P1; P2 - P3; P2 - P4; P2 - P5	n.s.	n.s.	n.s.
cytidine	n.s.	n.s.	n.s.	n.s.	n.s.	n.s.	1.6e-07	1.6e-06	P2 - P1; P3 - P1; P4 - P1; P5 - P1; P2 - P3; P2 - P4; P2 - P5
cytosine	n.s.	n.s.	n.s.	5.1e-08	3.6e-07	P2 - P1; P5 - P1; P2 - P3; P2 - P4; P2 - P5; P5 - P3	4.1e-06	2.6e-05	P2 - P1; P2 - P3; P2 - P4; P2 - P5
deoxyinosine	n.s.	n.s.	n.s.	0.0033	0.006	P2 - P1; P2 - P3; P2 - P4; P2 - P5	9.5e-06	5.4e-05	P2 - P1; P2 - P3; P2 - P4; P2 - P5
deoxyribose-phosphate	n.s.	n.s.	n.s.	0.0042	0.0073	P4 - P1; P5 - P1; P4 - P2; P5 - P2; P4 - P3; P5 - P3	n.s.	n.s.	n.s.
dGMP	2.6e-09	6.8e-08	P2 - P1; P2 - P3; P2 - P4; P2 - P5	3.5e-10	4.4e-09	P2 - P1; P1 - P4; P1 - P5; P2 - P3; P2 - P4; P2 - P5; P3 - P5	n.s.	n.s.	n.s.
Diiodothyronine	0.00035	0.0014	P2 - P1; P2 - P3; P2 - P4; P2 - P5	1.1e-06	5.3e-06	P2 - P1; P5 - P1; P2 - P3; P2 - P4; P2 - P5; P5 - P3	n.s.	n.s.	n.s.
dTMP	n.s.	n.s.	n.s.	3.1e-10	4.4e-09	P2 - P1; P2 - P3; P2 - P4; P2 - P5	n.s.	n.s.	n.s.
dUMP	n.s.	n.s.	n.s.	2.1e-06	9.7e-06	P2 - P1; P1 - P5; P2 - P3; P2 - P4; P2 - P5	n.s.	n.s.	n.s.
dUTP	2e-07	3.5e-06	P2 - P1; P2 - P3; P2 - P4; P2 - P5	n.s.	n.s.	n.s.	n.s.	n.s.	n.s.
FMN	n.s.	n.s.	n.s.	n.s.	n.s.	n.s.	6.4e-09	1e-07	P2 - P1; P2 - P3; P2 - P4; P2 - P5
glucose-1-phosphate	n.s.	n.s.	n.s.	0.0046	0.0076	P2 - P1; P2 - P4; P2 - P5; P3 - P5	n.s.	n.s.	n.s.
glucose-6-phosphate	n.s.	n.s.	n.s.	0.0046	0.0076	P2 - P1; P2 - P4; P2 - P5; P3 - P5	n.s.	n.s.	n.s.
glutathione	7.4e-09	1.5e-07	P2 - P1; P2 - P3; P2 - P4; P2 - P5	n.s.	n.s.	n.s.	n.s.	n.s.	n.s.
glutathione disulfide	1.1e-10	1.1e-08	P2 - P1; P2 - P3; P2 - P4; P2 - P5	3.4e-06	1.3e-05	P2 - P1; P2 - P3; P2 - P4; P2 - P5	n.s.	n.s.	n.s.
GMP	n.s.	n.s.	n.s.	n.s.	n.s.	n.s.	1.2e-07	1.3e-06	P2 - P1; P2 - P3; P2 - P4; P2 - P5
guanine	n.s.	n.s.	n.s.	1.3e-09	1.3e-08	P2 - P1; P3 - P1; P4 - P1; P5 - P1; P2 - P3; P2 - P4; P2 - P5	n.s.	n.s.	n.s.
guanosine	n.s.	n.s.	n.s.	n.s.	n.s.	n.s.	3e-13	8.9e-12	P2 - P1; P2 - P3; P2 - P4; P2 - P5
IMP	3.4e-06	4.3e-05	P2 - P1; P2 - P3; P2 - P4; P2 - P5	n.s.	n.s.	n.s.	1.1e-07	1.3e-06	P2 - P1; P2 - P3; P2 - P4; P2 - P5
Indoleacrylic acid	n.s.	n.s.	n.s.	2.4e-10	4.2e-09	P2 - P1; P1 - P3; P1 - P4; P2 - P3; P2 - P4; P2 - P5; P5 - P4	n.s.	n.s.	n.s.
inosine	n.s.	n.s.	n.s.	n.s.	n.s.	n.s.	8.2e-16	4.9e-14	P2 - P1; P2 - P3; P2 - P4; P2 - P5
lysine	n.s.	n.s.	n.s.	n.s.	n.s.	n.s.	2.8e-06	2e-05	P2 - P1; P1 - P5; P2 - P3; P2 - P4; P2 - P5; P3 - P5; P4 - P5
methionine	n.s.	n.s.	n.s.	0.0043	0.0074	P2 - P1; P2 - P3; P2 - P4; P2 - P5	n.s.	n.s.	n.s.
Methionine sulfoxide	n.s.	n.s.	n.s.	2.8e-06	1.2e-05	P2 - P1; P3 - P1; P2 - P3; P2 - P4; P2 - P5	n.s.	n.s.	n.s.
NAD	2.6e-09	6.8e-08	P2 - P1; P2 - P3; P2 - P4; P2 - P5	8.1e-12	3.4e-10	P2 - P1; P2 - P3; P2 - P4; P2 - P5	6.8e-09	1e-07	P2 - P1; P2 - P3; P2 - P4; P2 - P5
NADH	n.s.	n.s.	n.s.	1.2e-06	5.8e-06	P2 - P1; P2 - P3; P2 - P4; P2 - P5	5.9e-13	1.4e-11	P2 - P1; P2 - P3; P2 - P4; P2 - P5
NADP	n.s.	n.s.	n.s.	n.s.	n.s.	n.s.	1.6e-06	1.2e-05	P2 - P1; P2 - P3; P2 - P4; P2 - P5
Nicotinamide ribotide	0.0069	0.019	P2 - P1; P2 - P3; P2 - P4; P2 - P5	n.s.	n.s.	n.s.	1.2e-07	1.3e-06	P2 - P1; P2 - P3; P2 - P4; P2 - P5
orotate	0.0011	0.0039	P2 - P1; P2 - P3; P2 - P4; P2 - P5	n.s.	n.s.	n.s.	n.s.	n.s.	n.s.
phenylalanine	n.s.	n.s.	n.s.	3.1e-06	1.3e-05	P2 - P1; P2 - P3; P2 - P4; P2 - P5	n.s.	n.s.	n.s.
S-adenosyl-L-homoCysteine	0.00047	0.0018	P2 - P1; P2 - P3; P2 - P4; P2 - P5	n.s.	n.s.	n.s.	n.s.	n.s.	n.s.
S-methyl-5--thioadenosine	n.s.	n.s.	n.s.	2.4e-09	2.1e-08	P2 - P1; P2 - P3; P2 - P4; P2 - P5; P3 - P5; P4 - P5	n.s.	n.s.	n.s.
tryptophan	n.s.	n.s.	n.s.	7.3e-10	8.3e-09	P2 - P1; P1 - P3; P1 - P4; P2 - P3; P2 - P4; P2 - P5	n.s.	n.s.	n.s.
tyrosine	n.s.	n.s.	n.s.	8.8e-05	0.00024	P2 - P1; P2 - P3; P2 - P4; P2 - P5	n.s.	n.s.	n.s.
uridine	n.s.	n.s.	n.s.	5e-05	0.00015	P2 - P1; P2 - P3; P2 - P4; P2 - P5; P5 - P3	n.s.	n.s.	n.s.
xanthosine	0.0012	0.0041	P2 - P1; P2 - P3; P2 - P4; P2 - P5	2.7e-06	1.2e-05	P2 - P1; P2 - P3; P2 - P4; P2 - P5	n.s.	n.s.	n.s.
